# Supplementary material for: A record-high EQE of 7.65%@3300 cd m−2 achieved in non-doped near-ultraviolet OLEDs based on novel D′–D–A type bipolar fluorophores upon molecular configuration engineering
Source: Royal Society of Chemistry journal article supplement (doi:10.1039/d4sc02655a), 2024-01-01
Supplement: d4sc02655a1.pdf [file d4sc02655a1.pdf]

## Electronic Supplementary Information

### **A Record-High EQE of 7.65%@3300 cd m<sup>-2</sup> Achieved in Non-Doped Near-Ultraviolet OLEDs Based on Novel D'-D-A Type Bipolar Fluorophores upon Molecular Configuration Engineering**

Haoyuan Qi,<sup>a</sup> Danyu Xie,<sup>b</sup> Zexuan Gao,<sup>a</sup> Shengnan Wang,<sup>a</sup> Ling Peng,<sup>c</sup> Yuchao Liu,<sup>a</sup> Shian Ying,<sup>\*a</sup> Dongge Ma<sup>\*b</sup> and Shouke Yan<sup>\*a, d</sup>

<sup>a</sup> Key Laboratory of Rubber-Plastics, Ministry of Education, Qingdao University of Science & Technology, Qingdao 266042, P. R. China.

<sup>b</sup> Center for Aggregation-Induced Emission, Institute of Polymer Optoelectronic Materials and Devices, State Key Laboratory of Luminescent Materials and Devices, South China University of Technology, Guangzhou 510640, P. R. China.

<sup>c</sup> College of Chemistry and Chemical Engineering, Heze University, Heze 274015, P. R. China.

<sup>d</sup> State Key Laboratory of Chemical Resource Engineering, College of Materials Science and Engineering, Beijing University of Chemical Technology, Beijing 100029, P. R. China.

E-mail: shian0610@126.com (S. Ying); msdgm@scut.edu.cn (D. Ma);  
skyan@mail.buct.edu.cn (S. Yan)

# 1. Experimental Methods

## 1.1. Experimental measurements

$^1\text{H}$  and  $^{13}\text{C}$  nuclear magnetic resonance (NMR) spectra were performed by the Bruker AC400 spectrometer at 400 MHz and 100 MHz with  $\text{CDCl}_3$  and tetramethylsilane (TMS) as the solvent and internal standard, respectively. Mass spectra of compound were measured by High Resolution Quadrupole Time of Flight Tandem Mass Spectrometer (TOF-MS). Ultraviolet-visible absorption and emission spectra were carried out by using Hitachi U-2910 absorption spectrometer and Hitachi F-4700 spectrophotometer, respectively. Photoluminescence quantum yields (PLQYs) of materials in solution and film were estimated by using the integration sphere setup (Hamamatsu C11347-11) equipped with a xenon high-pressure lamp and a multichannel analyzer from 200 to 950 nm. Fluorescence lifetimes were determined on a FLS1000 transient fluorescence spectrometer with an EPL-340 optical laser. Thermogravimetric analysis (TGA) curves of materials were performed using a Netzsch (209F1) thermogravimetric analyzer under a nitrogen atmosphere ( $50 \text{ mL min}^{-1}$ ) at a heating rate of  $10 \text{ }^\circ\text{C min}^{-1}$ . Differential scanning calorimetry (DSC) curves of target compounds were recorded by a Netzsch DSC (204F1) instrument at a heating (or cooling) rate of  $10 \text{ }^\circ\text{C min}^{-1}$ . Cyclic voltammetry (CV) was measured on a CHI660E electrochemical workstation in a conventional three-electrode system including a glass carbon working electrode, a platinum wire auxiliary electrode, and an  $\text{Ag}/\text{Ag}^+$  standard reference electrode, where tetrabutylammonium hexafluorophosphate ( $\text{Bu}_4\text{NPF}_6$ , 0.1 M) in anhydrous dichloromethane acted as the supporting electrolyte and ferrocene served as the standard reference. The HOMO energy level ( $E_{\text{HOMO}}$ ) and the LUMO energy level ( $E_{\text{LUMO}}$ ) can be calculated by the following

**Equation 1 and 2:**

$$E_{\text{HOMO}} = -\frac{(E_{\text{OX}} - E_1^+ + 4.8)}{2} \quad (1)$$

$$E_{LUMO} = E_{HOMO} + E_g \quad (2)$$

Here,  $E_{ox}$  is the oxidation onset potential.  $\frac{E_1^+}{2}$  is the half wave potential of  $Fe^+/Fe$ .  $E_g$  was the optical bandgap evaluated from the onset of absorption spectrum.

## 1.2. Theoretical calculations

All the density functional theory (DFT) and time dependent DFT (TD-DFT) calculations were carried out using Gaussian 16 A.03 package. The optimized ground-state geometries, energy levels, and frontier molecular orbital (FMO) distributions were calculated on the basis of DFT by using B3LYP/6-31G(d, p) method. The geometry of the lowest singlet excited state ( $S_1$  state) was optimized by TD-DFT at the B3LYP/6-31G(d, p) level. Multiwfn 3.8 was utilized to analyze the natural transition orbitals (NTOs) of excited states.<sup>[24]</sup> Spin-orbit coupling (SOC) matrix elements were calculated by TD-DFT and the ORCA 4.1.1 package at B3LYP/6-31G(d, p).<sup>[25]</sup>

## 1.3. Device fabrication and measurement

Patterned indium-tin-oxide (ITO) glasses with a sheet resistance of 20  $\Omega$  per square were ultrasonically treated in detergents and deionized water, then dried for 30 mins at 120 °C. After treated by oxygen plasma for 7 mins, Clean ITO substrates were transferred into the vacuum deposition system. The target compounds used for device have been sublimated. When the pressure less than  $2 \times 10^{-4}$  Pa, the devices were fabricated. The evaporation rates of organic materials, lithium fluoride (LiF) and aluminum (Al) were 1-1.5, 0.2 and 5-10  $\text{\AA s}^{-1}$  via a shadow mask, which were detected by a frequency counter and calibrated by a Dektak 6 M profiler (Veeco). The emitting area ( $3 \times 3 \text{ mm}^2$ ) was determined by the overlap between ITO and Al electrodes. The current density–luminance–voltage characteristics were performed by the computer controlled Keithley 2450 Series Digital Source-meter and LS160 Luminancemeter (KONICAMINOLTA). EL spectra at different voltages were recorded by the optical analyzer

FLAME-S-VIS-NIR photometer. Supposing the light emitted by the devices accorded with the Lambertian distribution, the EQEs can be calculated from the EL spectra, luminance, and current density.

#### 1.4 Synthesis and characterization

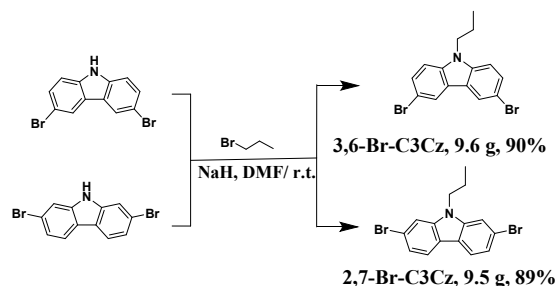

**Scheme S1.** Synthetic route of **3,6-Br-C3Cz** and **2,7-Br-C3Cz**.

**Synthesis of 3,6-dibromo-9-propyl-9H-carbazole (3,6-Br-C3Cz):** Under nitrogen atmosphere, 3,6-dibromo-9H-carbazole (9.5 g, 29.2 mmol), *N,N*-dimethylformamide (DMF, 80 mL) were added into a 250 mL two-neck round-bottom flask with the ice-water bath for 0.5 h. Sodium hydride (1.1 g, 43.8 mmol) divided into 4 times was added within 2 h. Then 1-bromopropane (2.9 mL, 32.1 mmol) was added. After reacted for 6 h at room temperature, the reaction mixture was extracted three times with  $\text{CH}_2\text{Cl}_2$  and water. The organic layer was dried with anhydrous  $\text{MgSO}_4$ , filtered, and evaporated under reduced pressure. The crude product was purified by silica-gel column chromatography using petroleum /  $\text{CH}_2\text{Cl}_2$  (8/1, v/v) as the eluant. Finally, a white solid was obtained (9.6 g, 90%).  $^1\text{H}$  NMR (400 MHz,  $\text{CDCl}_3$ )  $\delta$  8.11 (d,  $J = 1.9$  Hz, 2H), 7.53 (dd,  $J = 8.7, 1.9$  Hz, 2H), 7.27 – 7.23 (m, 2H), 4.19 (t,  $J = 7.1$  Hz, 2H), 1.86 (q,  $J = 7.3$  Hz, 2H), 0.92 (t,  $J = 7.4$  Hz, 3H).  $^{13}\text{C}$  NMR (101 MHz,  $\text{CDCl}_3$ )  $\delta$  139.40, 129.01, 123.44, 123.25, 111.95, 110.44, 77.36, 77.04, 76.72, 44.87, 22.23, 11.73.

**Synthesis of 2,7-dibromo-9-propyl-9H-carbazole (2,7-Br-C3Cz):** The synthetic procedure of **2,7-Br-C3Cz** is similar to that of **3,6-Br-C3Cz** with 2,7-dibromo-9H-carbazole

(9.5 g, 29.1 mmol) and 1-bromopropane (2.9 mL, 32.1 mmol) as raw materials. Finally, a white solid was obtained (9.5 g, 89%).  $^1\text{H NMR}$  (400 MHz,  $\text{CDCl}_3$ )  $\delta$  7.76 (d,  $J = 8.2$  Hz, 2H), 7.42 (d,  $J = 1.6$  Hz, 2H), 7.23 (dd,  $J = 8.3, 1.6$  Hz, 2H), 4.04 (t,  $J = 7.3$  Hz, 2H), 1.78 (h,  $J = 7.4$  Hz, 2H), 0.88 (t,  $J = 7.4$  Hz, 3H).  $^{13}\text{C NMR}$  (101 MHz,  $\text{CDCl}_3$ )  $\delta$  141.39, 122.52, 121.46, 121.25, 119.70, 112.02, 77.42, 77.11, 76.79, 44.83, 22.16, 11.73.

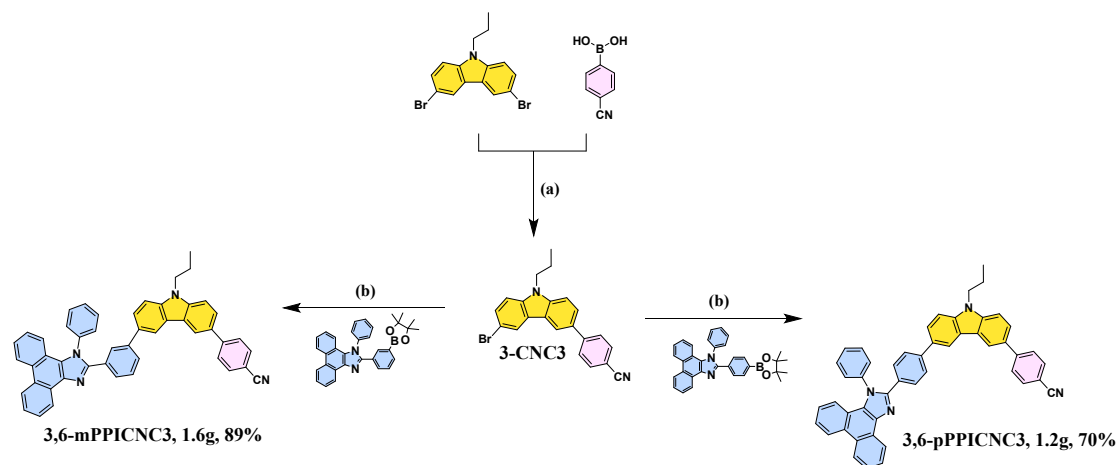

**Scheme 2.** Synthetic routes to **3,6-mPPICNC3** and **3,6-pPPICNC3**. (a)  $\text{Pd}(\text{PPh}_3)_4$ ,  $\text{K}_2\text{CO}_3$  (2M), THF, 75 °C, 18 h. (b).  $\text{Pd}(\text{PPh}_3)_4$ ,  $\text{K}_2\text{CO}_3$  (2M), THF, 80 °C, 24 h.

**Synthesis of 4-(6-bromo-9-propyl-9H-carbazol-3-yl)benzonitrile (3-CNC3):** Under nitrogen atmosphere, **3,6-Br-C3Cz** (8.0 g, 22.0 mmol), (4-cyanophenyl)boronic acid (1.6 g, 11.0 mmol), and tetrakis(triphenylphosphine)palladium ( $\text{Pd}(\text{PPh}_3)_4$ , 0.5 g, 0.4 mmol) were placed in a 250 mL two-neck round-bottom flask. Then tetrahydrofuran (THF, 60 mL), 2 M potassium carbonate (10 mL) were injected into the flask. The reaction mixture was stirred and refluxed at 75 °C for 18 h. After cooling to room temperature, the reaction mixture was extracted 3 times with  $\text{CH}_2\text{Cl}_2$  and water. The organic layer was dried with anhydrous  $\text{MgSO}_4$ , filtered, and evaporated under reduced pressure. The crude product was purified by silica-gel column chromatography using petroleum /  $\text{CH}_2\text{Cl}_2$  (4/1, v/v) as the mixed eluant, giving a white solid (2.1 g, 49%).  $^1\text{H NMR}$  (400 MHz,  $\text{CDCl}_3$ )  $\delta$  8.12 (d,  $J = 8.1$  Hz, 1H), 7.95 (d,  $J = 8.3$  Hz, 1H), 7.84 – 7.71 (m, 4H), 7.56 (dd,  $J = 8.5, 1.6$  Hz, 2H), 7.45 (dd,  $J = 8.2, 1.5$  Hz, 1H), 7.36 (dd,  $J$

= 8.3, 1.6 Hz, 1H), 4.27 (t,  $J = 7.2$  Hz, 2H), 1.94 (h,  $J = 7.4$  Hz, 2H), 1.01 (t,  $J = 7.4$  Hz, 3H).  $^{13}\text{C}$  NMR (101 MHz,  $\text{CDCl}_3$ )  $\delta$  146.29, 140.93, 139.70, 132.64, 132.59, 130.45, 128.89, 127.61, 125.65, 124.47, 123.24, 122.51, 119.32, 119.22, 112.14, 110.57, 109.97, 109.62, 77.37, 77.05, 76.73, 44.94, 22.32, 11.78.

**Synthesis of 4-(6-(3-(1-phenyl-1*H*-phenanthro[9,10-*d*]imidazol-2-yl)phenyl)-9-propyl-9*H*-carbazol-3-yl)benzotrile (3,6-mPPICNC3):** Under nitrogen atmosphere, **3-CNC3** (1.1 g, 2.7 mmol), 1-phenyl-2-(3-(4,4,5,5-tetramethyl-1,3,2-dioxaborolan-2-yl)phenyl)-1*H*-phenanthro[9,10-*d*]imidazole (1.4 g, 2.9 mmol) and  $\text{Pd}(\text{PPh}_3)_4$  (0.2 g, 0.2 mmol) were placed in a 250 mL two-neck round-bottom flask. Then, THF (60 mL), 2 M potassium carbonate (10.0 mL) were injected. The reaction mixture was stirred and refluxed at 80 °C for 24 h. After cooling to room temperature, the reaction mixture was extracted 3 times with  $\text{CH}_2\text{Cl}_2$  and water. The organic layer was dried with anhydrous  $\text{MgSO}_4$ , filtered, and evaporated under reduced pressure. The crude product was purified by silica-gel column chromatography using petroleum /  $\text{CH}_2\text{Cl}_2$  (4/1, v/v) as the eluting agent. Finally further purified by a multi-temperature-zone sublimator, a white solid was obtained (1.6 g, 89%).  $^1\text{H}$  NMR (400 MHz,  $\text{CDCl}_3$ )  $\delta$  8.80 (d,  $J = 8.4$  Hz, 1H), 8.73 (d,  $J = 8.3$  Hz, 1H), 8.40 (d,  $J = 1.8$  Hz, 1H), 8.19 (s, 1H), 7.97 (s, 1H), 7.88 – 7.81 (m, 2H), 7.80 – 7.67 (m, 8H), 7.65 – 7.39 (m, 8H), 7.32 – 7.26 (m, 3H), 7.22 (d,  $J = 8.2$  Hz, 1H), 4.34 (t,  $J = 7.1$  Hz, 2H), 1.98 (h,  $J = 7.3$  Hz, 2H), 1.02 (t,  $J = 7.4$  Hz, 3H).  $^{13}\text{C}$  NMR (101 MHz,  $\text{CDCl}_3$ )  $\delta$  146.64, 141.15, 140.70, 132.69, 130.45, 130.20, 129.27, 128.90, 127.79, 127.60, 125.74, 125.17, 124.25, 123.72, 123.29, 123.15, 120.97, 119.34, 119.18, 109.85, 109.53, 109.36, 44.96, 22.42, 11.84. TOF-MS(ESI)  $m/z$  calcd. for  $\text{C}_{49}\text{H}_{34}\text{N}_4$ : 678.2783;  $[\text{M}+\text{H}]^+$  found: 679.2866.

**Synthesis of 4-(6-(4-(1-phenyl-1*H*-phenanthro[9,10-*d*]imidazol-2-yl)phenyl)-9-propyl-9*H*-carbazol-3-yl)benzotrile (3,6-pPPICNC3):** The synthetic procedure of **3,6-pPPICNC3** is

similar to that of **3,6-mPPICNC3** with **3-CNC3** (1.0 g, 2.5 mmol), 1-phenyl-2-(4-(4,4,5,5-tetramethyl-1,3,2-dioxaborolan-2-yl)phenyl)-1*H*-phenanthro[9,10-*d*]imidazole (1.3 g, 2.6 mmol) and Pd(PPh<sub>3</sub>)<sub>4</sub> (0.2 g, 0.2 mmol) as starting materials, giving a white solid (1.2 g, 70%). <sup>1</sup>H NMR (400 MHz, CDCl<sub>3</sub>) δ 9.00 (s, 1H), 8.79 (d, *J* = 8.4 Hz, 1H), 8.72 (d, *J* = 8.3 Hz, 1H), 8.36 (t, *J* = 2.2 Hz, 2H), 7.87 – 7.63 (m, 15H), 7.62 – 7.56 (m, 2H), 7.56 – 7.46 (m, 3H), 7.31 – 7.26 (m, 1H), 7.19 (d, *J* = 8.2 Hz, 1H), 4.32 (t, *J* = 7.1 Hz, 2H), 1.96 (p, *J* = 7.3 Hz, 2H), 1.01 (t, *J* = 7.4 Hz, 3H). <sup>13</sup>C NMR (101 MHz, CDCl<sub>3</sub>) δ 146.49, 141.16, 140.80, 132.63, 130.35, 130.24, 129.96, 129.18, 127.62, 126.91, 126.41, 125.58, 125.20, 124.18, 123.65, 123.33, 123.13, 120.91, 119.26, 118.93, 109.85, 109.55, 109.43, 44.96, 22.40, 11.83. TOF-MS(ESI) *m/z* calcd. for C<sub>49</sub>H<sub>34</sub>N<sub>4</sub>: 678.2783; [M+H]<sup>+</sup> found: 679.2866.

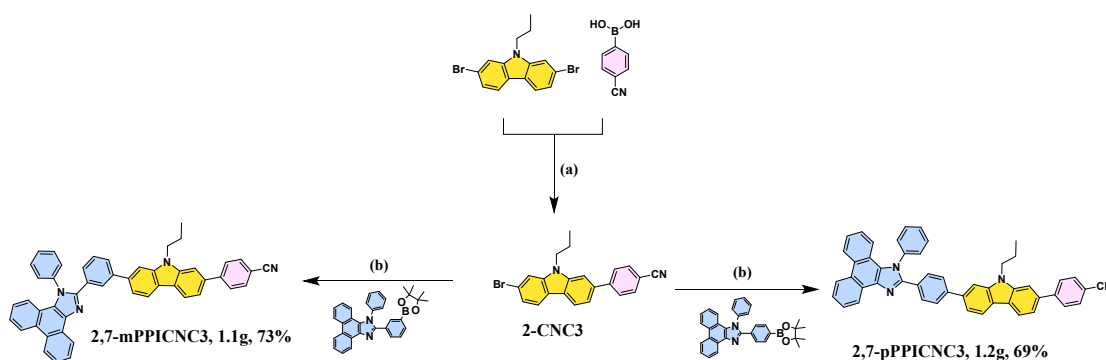

**Scheme 3.** Synthetic routes to **2,7-mPPICNC3** and **2,7-pPPICNC3**. (a) Pd(PPh<sub>3</sub>)<sub>4</sub>, K<sub>2</sub>CO<sub>3</sub> (2M), THF, 75 °C, 18 h. (b) Pd(PPh<sub>3</sub>)<sub>4</sub>, K<sub>2</sub>CO<sub>3</sub> (2M), THF, 80 °C, 24 h.

**Synthesis of 4-(7-bromo-9-propyl-9*H*-carbazol-2-yl)benzonitrile (2-CNC3):** The synthetic procedure of **2-CNC3** is similar to that of **3-NC3** with **2,7-Br-C3Cz** (13.2 g, 36.1 mmol), (4-cyanophenyl)boronic acid (2.5 g, 17.2 mmol) and Pd(PPh<sub>3</sub>)<sub>4</sub> (0.7 g, 0.6 mmol) as the starting materials, giving a white solid (3.2 g, 48%). <sup>1</sup>H NMR (400 MHz, CDCl<sub>3</sub>) δ 8.26 (t, *J* = 2.0 Hz, 2H), 7.83 – 7.67 (m, 5H), 7.57 (dd, *J* = 8.7, 1.9 Hz, 1H), 7.49 (d, *J* = 8.6 Hz, 1H), 7.32 (d, *J* = 8.7 Hz, 1H), 4.29 (t, *J* = 7.1 Hz, 2H), 1.93 (h, *J* = 7.3 Hz, 2H), 0.98 (t, *J* = 7.4 Hz, 3H). <sup>13</sup>C NMR (101 MHz, CDCl<sub>3</sub>) δ 146.52, 142.03, 141.10, 137.31, 132.63, 128.15, 122.68, 122.48,

121.75, 121.29, 120.96, 119.96, 119.07, 118.92, 112.06, 110.71, 107.62, 77.38, 77.06, 76.74, 44.83, 22.29, 11.82.

**Synthesis of 4-(7-(3-(1-phenyl-1*H*-phenanthro[9,10-*d*]imidazol-2-yl)phenyl)-9-propyl-9*H*-carbazol-2-yl)benzotrile (2,7-**mPPICNC3**):** The synthetic procedure of **2,7-mPPICNC3** is similar to that of **3,6-mPPICNC3** with **2-CNC3** (1.0 g, 2.6 mmol), 1-phenyl-2-(4-(4,4,5,5-tetramethyl-1,3,2-dioxaborolan-2-yl)phenyl)-1*H*-phenanthro[9,10-*d*]imidazole (1.3 g, 2.6 mmol) and Pd(PPh<sub>3</sub>)<sub>4</sub> (0.2 g, 0.2 mmol) as the starting materials, giving a white solid powder (1.2 g, 69%). <sup>1</sup>H NMR (400 MHz, CDCl<sub>3</sub>) δ 8.93 (s, 1H), 8.79 (d, J = 8.3 Hz, 1H), 8.73 (d, J = 8.3 Hz, 1H), 8.16 (dd, J = 10.3, 8.0 Hz, 2H), 7.85 – 7.80 (m, 2H), 7.79 – 7.70 (m, 5H), 7.69 – 7.64 (m, 5H), 7.63 – 7.57 (m, 4H), 7.55 – 7.45 (m, 3H), 7.31 – 7.26 (m, 2H), 7.20 (dd, J = 8.4, 1.4 Hz, 1H), 4.38 (t, J = 7.2 Hz, 2H), 2.00 (p, J = 7.3 Hz, 2H), 1.04 (t, J = 7.4 Hz, 3H). <sup>13</sup>C NMR (101 MHz, CDCl<sub>3</sub>) δ 144.17, 142.15, 141.67, 141.59, 140.98, 138.67, 138.26, 138.01, 130.31, 129.92, 129.44, 129.30, 128.80, 128.41, 128.28, 128.11, 127.47, 126.67, 126.39, 126.17, 126.05, 125.87, 125.67, 125.12, 124.20, 123.44, 123.18, 123.02, 122.92, 122.34, 121.94, 120.94, 120.85, 120.66, 120.41, 120.03, 118.91, 118.68, 109.94, 107.42, 107.37, 44.65, 22.44, 11.92. TOF-MS(ESI) m/z calcd. for C<sub>49</sub>H<sub>34</sub>N<sub>4</sub>: 678.2783; [M+H]<sup>+</sup> found: 679.2862.

**Synthesis of 4-(7-(3-(1-phenyl-1*H*-phenanthro[9,10-*d*]imidazol-2-yl)phenyl)-9-propyl-9*H*-carbazol-2-yl)benzotrile (2,7-**pPPICNC3**):** The synthetic procedure of **2,7-pPPICNC3** is similar to that of **3,6-mPPICNC3** with **2-CNC3** (0.9 g, 2.6 mmol), 1-phenyl-2-(3-(4,4,5,5-tetramethyl-1,3,2-dioxaborolan-2-yl)phenyl)-1*H*-phenanthro[9,10-*d*]imidazole (1.2 g, 2.4 mmol) and Pd(PPh<sub>3</sub>)<sub>4</sub> (0.2 g, 0.2 mmol) as the starting materials, giving as a light yellow solid powder (1.1 g, 73%). <sup>1</sup>H NMR (400 MHz, CDCl<sub>3</sub>) δ 8.94 (s, 1H), 8.76 (ddd, J = 25.3, 8.4, 1.1 Hz, 2H), 8.14 (dd, J = 19.5, 8.1 Hz, 2H), 7.96 (s, 1H), 7.84 – 7.75 (m, 5H), 7.68 (dh, J = 7.9, 1.8 Hz, 5H), 7.61 (dd, J = 2.4, 1.3 Hz, 2H), 7.58 (d, J = 1.5 Hz, 1H), 7.56 – 7.40 (m, 4H), 7.35



– 7.14 (m, 4H), 4.39 (t, J = 7.1 Hz, 2H), 2.00 (q, J = 7.3 Hz, 2H), 1.04 (t, J = 7.4 Hz, 3H). <sup>13</sup>C NMR (101 MHz, DMSO-*d*) δ 150.43, 146.14, 142.03, 141.81, 141.78, 139.02, 137.83, 137.31, 136.46, 132.92, 130.79, 130.55, 129.65, 129.52, 129.50, 129.11, 128.40, 128.27, 127.49, 127.32, 127.07, 126.67, 125.89, 125.33, 124.71, 123.82, 123.04, 122.73, 122.46, 121.88, 121.21, 120.65, 119.15, 118.41, 118.39, 110.18, 108.25, 107.74, 44.00, 22.37, 11.46. TOF-MS(ESI) m/z calcd. for C<sub>49</sub>H<sub>34</sub>N<sub>4</sub>: 678.2783; [M+H]<sup>+</sup> found: 679.2864.

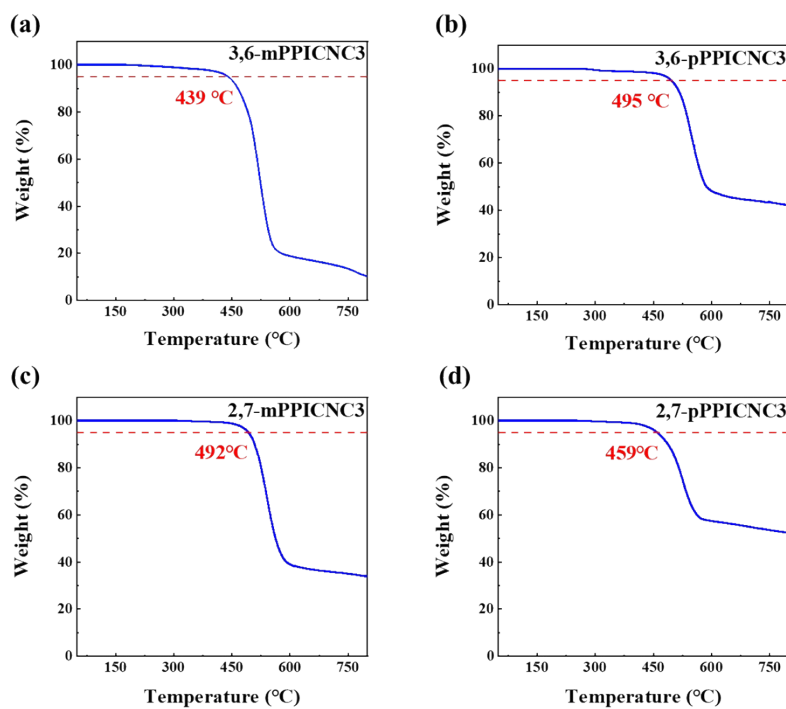

**Figure S1.** TGA thermograms of **3,6-mPPICNC3**, **3,6-pPPICNC3**, **2,7-mPPICNC3** and **2,7-pPPICNC3**.

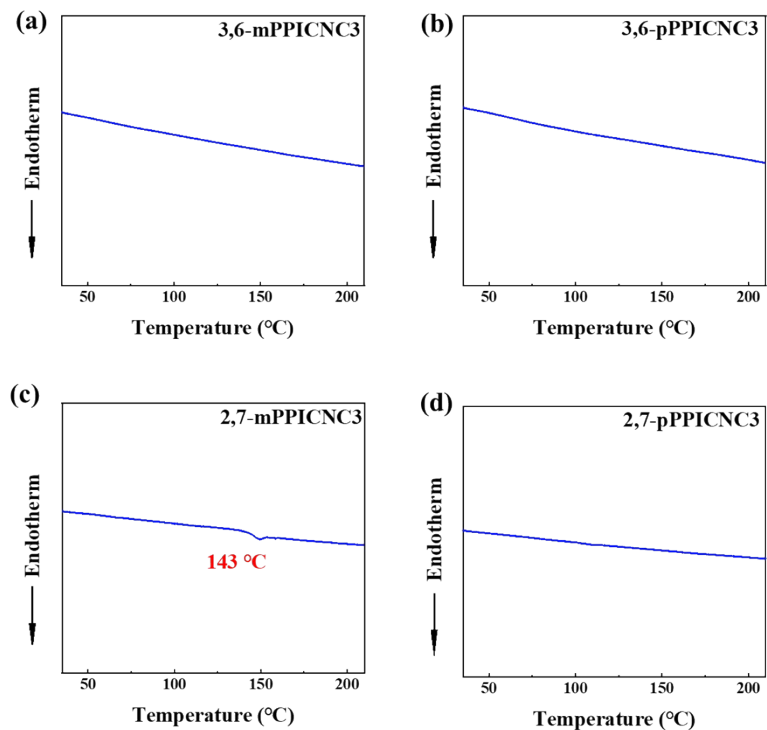

**Figure S2.** DSC curves of **3,6-mPPICNC3**, **3,6-pPPICNC3**, **2,7-mPPICNC3** and **2,7-pPPICNC3**.

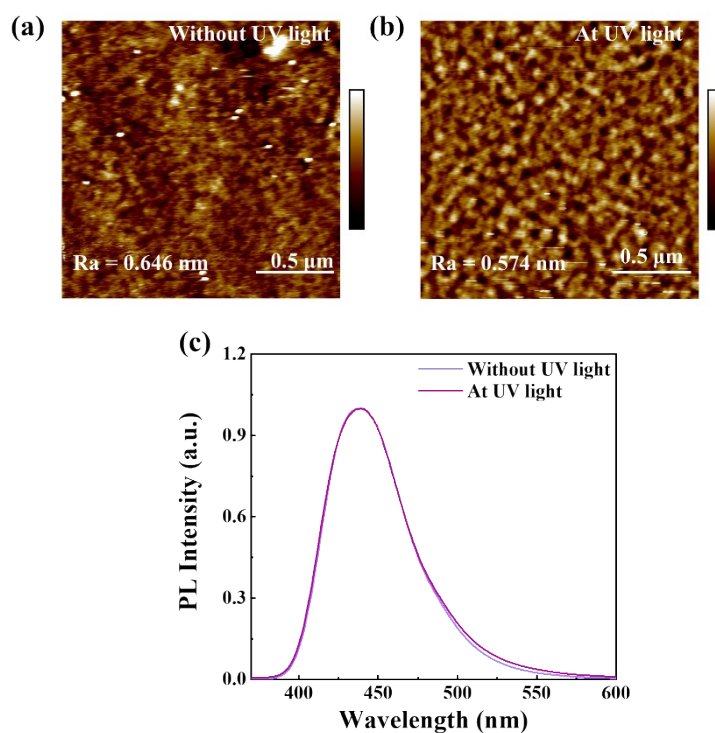

**Figure S3.** (a) and (b) Atomic Force Microscope (AFM) height images of **3,6-pPPICNC3** films without/with exposure at ultraviolet lamp. (c) PL spectra of **3,6-pPPICNC3** films without/with exposure at ultraviolet lamp

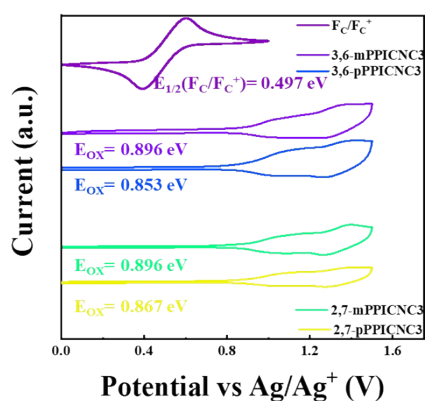

**Figure S4.** Cyclic voltammograms in dichloromethane solution of **3,6-mPPICNC3**, **3,6-pPPICNC3**, **2,7-mPPICNC3** and **2,7-pPPICNC3**.

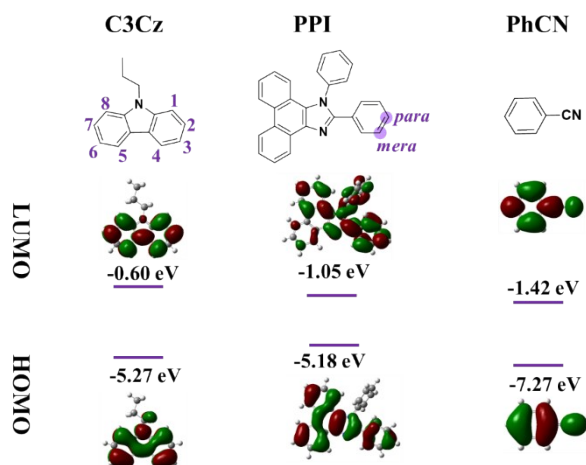

**Figure S5.** Frontier molecular orbitals (FMOs) and chemical structures of *N*-propyl-modified carbazole (C3Cz), benzonitrile (PhCN) and 1,2-diphenyl-1*H*-phenanthro[9,10-*d*]imidazole (PPI).

**Table S1.** Bond length in  $S_0$  and  $S_1$  of 3,6-*m*PPICNC3, 3,6-*p*PPICNC3, 2,7-*m*PPICNC3 and 2,7-*p*PPICNC3.

| Compounds             | Structure                                                                           | $S_0$        |              |              | $S_1$        |              |              |
|-----------------------|-------------------------------------------------------------------------------------|--------------|--------------|--------------|--------------|--------------|--------------|
|                       |                                                                                     | $L_1$<br>[Å] | $L_2$<br>[Å] | $L_3$<br>[Å] | $L_1$<br>[Å] | $L_2$<br>[Å] | $L_3$<br>[Å] |
| 3,6- <i>m</i> PPICNC3 |  | 1.477        | 1.481        | 1.467        | 1.455        | 1.476        | 1.450        |
| 3,6- <i>p</i> PPICNC3 |  | 1.478        | 1.479        | 1.467        | 1.455        | 1.452        | 1.439        |
| 2,7- <i>m</i> PPICNC3 |  | 1.479        | 1.481        | 1.470        | 1.448        | 1.470        | 1.451        |
| 2,7- <i>p</i> PPICNC3 |  | 1.479        | 1.479        | 1.467        | 1.456        | 1.450        | 1.437        |

**Table S2.** NTOs analysis of singlet and triplet excited states for **3,6-mPPICNC3**.

| <b>3,6-mPPICNC3</b>      |                                                                                     |               |                                                                                     |                          |                                                                                      |               |                                                                                       |
|--------------------------|-------------------------------------------------------------------------------------|---------------|-------------------------------------------------------------------------------------|--------------------------|--------------------------------------------------------------------------------------|---------------|---------------------------------------------------------------------------------------|
| <b>Singlets</b>          |                                                                                     |               | <b>Triples</b>                                                                      |                          |                                                                                      |               |                                                                                       |
|                          | Hole                                                                                |               | Hole                                                                                |                          | Particle                                                                             |               |                                                                                       |
| $S_0 \rightarrow S_1$    | 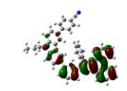   | <b>99.80%</b> |    | $S_0 \rightarrow T_1$    |    | <b>75.16%</b> |    |
| $S_0 \rightarrow S_2$    |    | <b>93.43%</b> |    | $S_0 \rightarrow T_2$    |    | <b>77.16%</b> |    |
| $S_0 \rightarrow S_3$    |    | <b>93.43%</b> |    | $S_0 \rightarrow T_3$    |    | <b>63.75%</b> |    |
| $S_0 \rightarrow S_4$    |    | <b>85.41%</b> |    | $S_0 \rightarrow T_4$    |    | <b>74.70%</b> |    |
| $S_0 \rightarrow S_5$    |    | <b>74.99%</b> |    | $S_0 \rightarrow T_5$    |    | <b>56.59%</b> |    |
| $S_0 \rightarrow S_6$    |   | <b>82.61%</b> |   | $S_0 \rightarrow T_6$    |   | <b>91.82%</b> |   |
| $S_0 \rightarrow S_7$    |  | <b>84.48%</b> |  | $S_0 \rightarrow T_7$    |  | <b>87.71%</b> |  |
| $S_0 \rightarrow S_8$    |  | <b>78.96%</b> |  | $S_0 \rightarrow T_8$    |  | <b>68.69%</b> |  |
| $S_0 \rightarrow S_9$    |  | <b>63.52%</b> |  | $S_0 \rightarrow T_9$    |  | <b>54.35%</b> |  |
| $S_0 \rightarrow S_{10}$ |  | <b>92.87%</b> |  | $S_0 \rightarrow T_{10}$ |  | <b>72.30%</b> |  |

**Table S3.** NTOs analysis of singlet and triplet excited states for **2,7-mPPICNC3**.

| <b>2,7-mPPICNC3</b>      |                                                                                     |               |                                                                                     |                          |                                                                                      |               |                                                                                       |
|--------------------------|-------------------------------------------------------------------------------------|---------------|-------------------------------------------------------------------------------------|--------------------------|--------------------------------------------------------------------------------------|---------------|---------------------------------------------------------------------------------------|
| <b>Singlets</b>          |                                                                                     |               | <b>Triplets</b>                                                                     |                          |                                                                                      |               |                                                                                       |
|                          | Hole                                                                                |               | Particle                                                                            |                          | Hole                                                                                 |               | Particle                                                                              |
| $S_0 \rightarrow S_1$    | 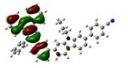   | <b>99.25%</b> |    | $S_0 \rightarrow T_1$    |    | <b>60.27%</b> |    |
| $S_0 \rightarrow S_2$    |    | <b>96.90%</b> |    | $S_0 \rightarrow T_2$    |    | <b>51.98%</b> |    |
| $S_0 \rightarrow S_3$    |    | <b>80.59%</b> |    | $S_0 \rightarrow T_3$    |    | <b>96.17%</b> |    |
| $S_0 \rightarrow S_4$    |    | <b>77.44%</b> |    | $S_0 \rightarrow T_4$    |    | <b>67.62%</b> |    |
| $S_0 \rightarrow S_5$    |    | <b>92.38%</b> |    | $S_0 \rightarrow T_5$    |    | <b>67.15%</b> |    |
| $S_0 \rightarrow S_6$    |    | <b>75.18%</b> |    | $S_0 \rightarrow T_6$    |    | <b>96.19%</b> |    |
| $S_0 \rightarrow S_7$    |   | <b>88.17%</b> |   | $S_0 \rightarrow T_7$    |   | <b>90.40%</b> |   |
| $S_0 \rightarrow S_8$    |  | <b>92.38%</b> |  | $S_0 \rightarrow T_8$    |  | <b>77.67%</b> |  |
| $S_0 \rightarrow S_9$    |  | <b>73.56%</b> |  | $S_0 \rightarrow T_9$    |  | <b>68.46%</b> |  |
| $S_0 \rightarrow S_{10}$ |  | <b>94.03%</b> |  | $S_0 \rightarrow T_{10}$ |  | <b>62.35%</b> |  |

**Table S4.** NTOs analysis of singlet and triplet excited states for **3,6-pPPICNC3**.

| <b>3,6-pPPICNC3</b>      |                                                                                     |               |                                                                                     |                          |                                                                                       |               |                                                                                       |
|--------------------------|-------------------------------------------------------------------------------------|---------------|-------------------------------------------------------------------------------------|--------------------------|---------------------------------------------------------------------------------------|---------------|---------------------------------------------------------------------------------------|
| <b>Singlets</b>          |                                                                                     |               | <b>Triples</b>                                                                      |                          |                                                                                       |               |                                                                                       |
|                          | Hole                                                                                |               |                                                                                     | Hole                     |                                                                                       |               |                                                                                       |
|                          |                                                                                     | Particle      |                                                                                     |                          | Particle                                                                              |               |                                                                                       |
| $S_0 \rightarrow S_1$    | 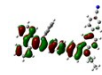   | <b>98.95%</b> |    | $S_0 \rightarrow T_1$    |    | <b>82.36%</b> |    |
| $S_0 \rightarrow S_2$    |    | <b>97.32%</b> |    | $S_0 \rightarrow T_2$    |    | <b>71.97%</b> |    |
| $S_0 \rightarrow S_3$    |    | <b>84.58%</b> |    | $S_0 \rightarrow T_3$    |    | <b>61.72%</b> |    |
| $S_0 \rightarrow S_4$    |    | <b>90.01%</b> |    | $S_0 \rightarrow T_4$    |    | <b>85.48%</b> |    |
| $S_0 \rightarrow S_5$    |    | <b>87.03%</b> |    | $S_0 \rightarrow T_5$    |    | <b>57.95%</b> |    |
| $S_0 \rightarrow S_6$    |    | <b>93.35%</b> |    | $S_0 \rightarrow T_6$    |    | <b>91.23%</b> |    |
| $S_0 \rightarrow S_7$    |    | <b>67.90%</b> |    | $S_0 \rightarrow T_7$    |    | <b>89.65%</b> |    |
| $S_0 \rightarrow S_8$    |   | <b>77.59%</b> |   | $S_0 \rightarrow T_8$    |   | <b>64.00%</b> |   |
| $S_0 \rightarrow S_9$    |  | <b>79.23%</b> |  | $S_0 \rightarrow T_9$    |  | <b>69.31%</b> |  |
| $S_0 \rightarrow S_{10}$ |  | <b>57.22%</b> |  | $S_0 \rightarrow T_{10}$ |  | <b>64.36%</b> |  |

**Table S5.** NTOs analysis of singlet and triplet excited states for **2,7-pPPICNC3**.

| <b>2,7-pPPICNC3</b>      |                                                                                     |               |                                                                                     |                          |                                                                                      |                                                                                       |
|--------------------------|-------------------------------------------------------------------------------------|---------------|-------------------------------------------------------------------------------------|--------------------------|--------------------------------------------------------------------------------------|---------------------------------------------------------------------------------------|
| <b>Singlets</b>          |                                                                                     |               | <b>Triples</b>                                                                      |                          |                                                                                      |                                                                                       |
|                          | <b>Hole</b>                                                                         |               | <b>Hole</b>                                                                         |                          | <b>Particle</b>                                                                      |                                                                                       |
| $S_0 \rightarrow S_1$    | 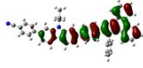   | <b>99.14%</b> |    | $S_0 \rightarrow T_1$    |    |    |
| $S_0 \rightarrow S_2$    |    | <b>96.22%</b> |    | $S_0 \rightarrow T_2$    |    |    |
| $S_0 \rightarrow S_3$    |    | <b>85.15%</b> |    | $S_0 \rightarrow T_3$    |    |    |
| $S_0 \rightarrow S_4$    |    | <b>80.01%</b> |    | $S_0 \rightarrow T_4$    |    |    |
| $S_0 \rightarrow S_5$    |    | <b>87.21%</b> |    | $S_0 \rightarrow T_5$    |    |    |
| $S_0 \rightarrow S_6$    |    | <b>84.08%</b> |    | $S_0 \rightarrow T_6$    |    |    |
| $S_0 \rightarrow S_7$    |   | <b>61.21%</b> |   | $S_0 \rightarrow T_7$    |   |   |
| $S_0 \rightarrow S_8$    |  | <b>76.08%</b> |  | $S_0 \rightarrow T_8$    |  |  |
| $S_0 \rightarrow S_9$    |  | <b>95.16%</b> |  | $S_0 \rightarrow T_9$    |  |  |
| $S_0 \rightarrow S_{10}$ |  | <b>70.72%</b> |  | $S_0 \rightarrow T_{10}$ |  |  |



**Table S6.** Energy levels of singlet and triplet states, oscillator strengths of singlet states for **3,6-mPPICNC3** and **3,6-pPPICNC3**.

| 3,6-mPPICNC3     |       |                  |       |                       | 3,6-pPPICNC3     |       |                  |       |                       |
|------------------|-------|------------------|-------|-----------------------|------------------|-------|------------------|-------|-----------------------|
| S Excited States | [eV]  | T Excited States | [eV]  | S Oscillator Strength | S Excited States | [eV]  | T Excited States | [eV]  | S Oscillator Strength |
| S <sub>1</sub>   | 3.343 | T <sub>1</sub>   | 2.710 | 0.0321                | S <sub>1</sub>   | 3.285 | T <sub>1</sub>   | 2.606 | 0.4862                |
| S <sub>2</sub>   | 3.489 | T <sub>2</sub>   | 2.826 | 0.1934                | S <sub>2</sub>   | 3.491 | T <sub>2</sub>   | 2.840 | 0.6983                |
| S <sub>3</sub>   | 3.597 | T <sub>3</sub>   | 3.042 | 0.0770                | S <sub>3</sub>   | 3.608 | T <sub>3</sub>   | 2.973 | 0.0482                |
| S <sub>4</sub>   | 3.648 | T <sub>4</sub>   | 3.170 | 0.6468                | S <sub>4</sub>   | 3.677 | T <sub>4</sub>   | 3.150 | 0.0151                |
| S <sub>5</sub>   | 3.736 | T <sub>5</sub>   | 3.228 | 0.0156                | S <sub>5</sub>   | 3.698 | T <sub>5</sub>   | 3.234 | 0.2772                |
| S <sub>6</sub>   | 3.765 | T <sub>6</sub>   | 3.339 | 0.3918                | S <sub>6</sub>   | 3.840 | T <sub>6</sub>   | 3.319 | 0.0888                |
| S <sub>7</sub>   | 3.908 | T <sub>7</sub>   | 3.354 | 0.0169                | S <sub>7</sub>   | 3.896 | T <sub>7</sub>   | 3.367 | 0.0424                |
| S <sub>8</sub>   | 3.914 | T <sub>8</sub>   | 3.440 | 0.0396                | S <sub>8</sub>   | 3.904 | T <sub>8</sub>   | 3.460 | 0.0447                |
| S <sub>9</sub>   | 3.941 | T <sub>9</sub>   | 3.548 | 0.0894                | S <sub>9</sub>   | 4.003 | T <sub>9</sub>   | 3.593 | 0.0117                |
| S <sub>10</sub>  | 3.988 | T <sub>10</sub>  | 3.614 | 0.0280                | S <sub>10</sub>  | 4.050 | T <sub>10</sub>  | 3.666 | 0.0122                |

**Table S7.** Energy levels of singlet and triplet states, oscillator strengths of singlet states for **2,7-mPPICNC3** and **2,7-pPPICNC3**.

| 2,7-mPPICNC3     |       |                  |       |                       | 2,7-pPPICNC3     |       |                  |       |                       |
|------------------|-------|------------------|-------|-----------------------|------------------|-------|------------------|-------|-----------------------|
| S Excited States | [eV]  | T Excited States | [eV]  | S Oscillator Strength | S Excited States | [eV]  | T Excited States | [eV]  | S Oscillator Strength |
| S <sub>1</sub>   | 3.343 | T <sub>1</sub>   | 2.626 | 0.0284                | S <sub>1</sub>   | 3.107 | T <sub>1</sub>   | 2.506 | 1.0726                |
| S <sub>2</sub>   | 3.390 | T <sub>2</sub>   | 2.716 | 0.0196                | S <sub>2</sub>   | 3.384 | T <sub>2</sub>   | 2.732 | 0.0173                |
| S <sub>3</sub>   | 3.513 | T <sub>3</sub>   | 2.936 | 1.2908                | S <sub>3</sub>   | 3.560 | T <sub>3</sub>   | 2.934 | 0.7868                |
| S <sub>4</sub>   | 3.695 | T <sub>4</sub>   | 3.065 | 0.2582                | S <sub>4</sub>   | 3.658 | T <sub>4</sub>   | 3.279 | 0.2949                |
| S <sub>5</sub>   | 3.741 | T <sub>5</sub>   | 3.253 | 0.0148                | S <sub>5</sub>   | 3.689 | T <sub>5</sub>   | 3.326 | 0.0368                |
| S <sub>6</sub>   | 3.912 | T <sub>6</sub>   | 3.324 | 0.0005                | S <sub>6</sub>   | 3.848 | T <sub>6</sub>   | 3.333 | 0.0525                |
| S <sub>7</sub>   | 3.926 | T <sub>7</sub>   | 3.341 | 0.1000                | S <sub>7</sub>   | 3.860 | T <sub>7</sub>   | 3.518 | 0.0042                |
| S <sub>8</sub>   | 3.969 | T <sub>8</sub>   | 3.545 | 0.0347                | S <sub>8</sub>   | 3.940 | T <sub>8</sub>   | 3.767 | 0.0076                |
| S <sub>9</sub>   | 4.000 | T <sub>9</sub>   | 3.653 | 0.0053                | S <sub>9</sub>   | 3.961 | T <sub>9</sub>   | 3.804 | 0.0571                |
| S <sub>10</sub>  | 4.035 | T <sub>10</sub>  | 3.696 | 0.0008                | S <sub>10</sub>  | 4.076 | T <sub>10</sub>  | 3.845 | 0.0075                |

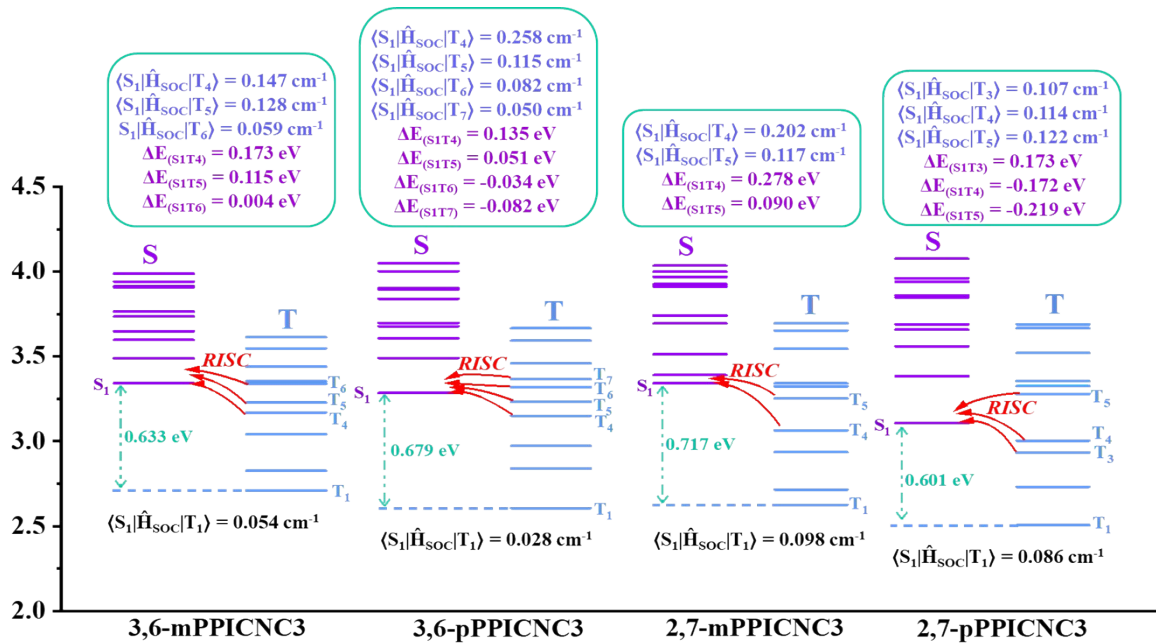

**Figure S6.** Singlet and triplet energy levels and SOC matrix elements of **3,6-mPPICNC3**, **3,6-pPPICNC3**, **2,7-mPPICNC3** and **2,7-pPPICNC3**, calculated by TD-DFT methods.

### Detailed Analysis of High-lying RISC Process

As for **3,6-pPPICNC3**, The  $S_1/T_1$  energy splitting ( $\Delta E_{S1T1}$ ) is as large as 0.633 eV with a small spin-orbit coupling (SOC) constant of 0.028 cm<sup>-1</sup>, which is hardly to facilitate the upconversion of the excitations on  $T_1$  to  $S_1$  through the RISC process. The  $S_1$  state of **3,6-pPPICNC3** shows a typical HLCT state characteristic, while the high-lying triplet states ( $T_4$ ,  $T_5$ ,  $T_6$  and  $T_7$ ) exhibit HLCT, LE, HLCT and CT- dominated HLCT states with small energy differences (0.135, 0.051, -0.034 and -0.082 eV) between  $S_1$  and them. As Fermi's golden rule remarks, the RISC rate ( $k_{RISC}$ ) has a close relationship with the SOC value and the energy gap between singlet and triplet states. The relationship can be expressed:

$$k_{RISC} \propto |\langle S | \hat{H}_{SOC} | T \rangle|^2 \exp\left(\frac{-\Delta E_{ST}}{k_B T_r}\right) \quad (1)$$

Here,  $k_B$  is the Boltzmann constant,  $\langle S|\hat{H}_{soc}|T\rangle$  is the SOC matrix element between singlet and triplet states, and  $T_r$  is temperature. The SOC values between  $S_1$  and  $T_4$ ,  $T_5$ ,  $T_6$  and  $T_7$  for **3,6-pPPICNC3** are as large as 0.258, 0.115, 0.082 and 0.050  $\text{cm}^{-1}$ , which facilitate multichannel high-lying RISC processes from  $T_4$ ,  $T_5$ ,  $T_6$  and  $T_7$  to  $S_1$ .

As for **2,7-mPPICNC3** and **2,7-pPPICNC3** with the CT- dominated HLCT and HLCT state features, the  $\Delta E_{S1T1}$  values are 0.717 and 0.601 eV with SOC constants of 0.098 and 0.086  $\text{cm}^{-1}$ , which illustrates the thermally activated delayed fluorescence mechanism can be excluded. Both  $T_4$  and  $T_5$  states for **2,7-mPPICNC3** exhibit obvious LE states with small energy differences of 0.278 and 0.090 eV and large SOC values of 0.202 and 0.117  $\text{cm}^{-1}$  between  $S_1$  and them, while all the  $T_3$ ,  $T_4$  and  $T_5$  states for **2,7-pPPICNC3** show obvious HLCT states with small energy differences of 0.173, -0.172 and -0.219 eV and large SOC values of 0.107, 0.114 and 0.122  $\text{cm}^{-1}$  between  $S_1$  and them. This could facilitate the high-lying RISC processes from  $T_4$  and  $T_5$  to  $S_1$  for **2,7-mPPICNC3**, and from  $T_3$ ,  $T_4$  and  $T_5$  to  $S_1$  for **2,7-pPPICNC3**.

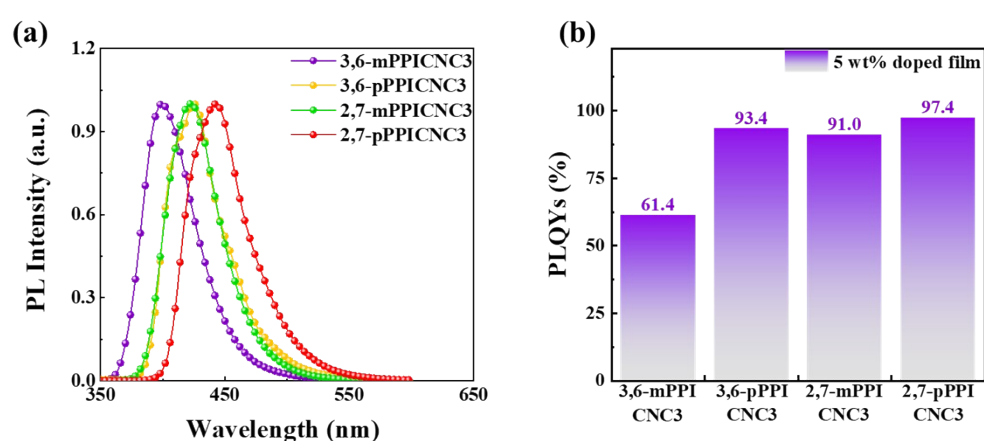

**Figure S7.** (a) Normalized PL spectra of 5 wt% doped in PMMA films and (b) PLQYs in 5 wt% doped in PMMA films of **3,6-mPPICNC3**, **3,6-pPPICNC3**, **2,7-mPPICNC3** and **2,7-pPPICNC3**.

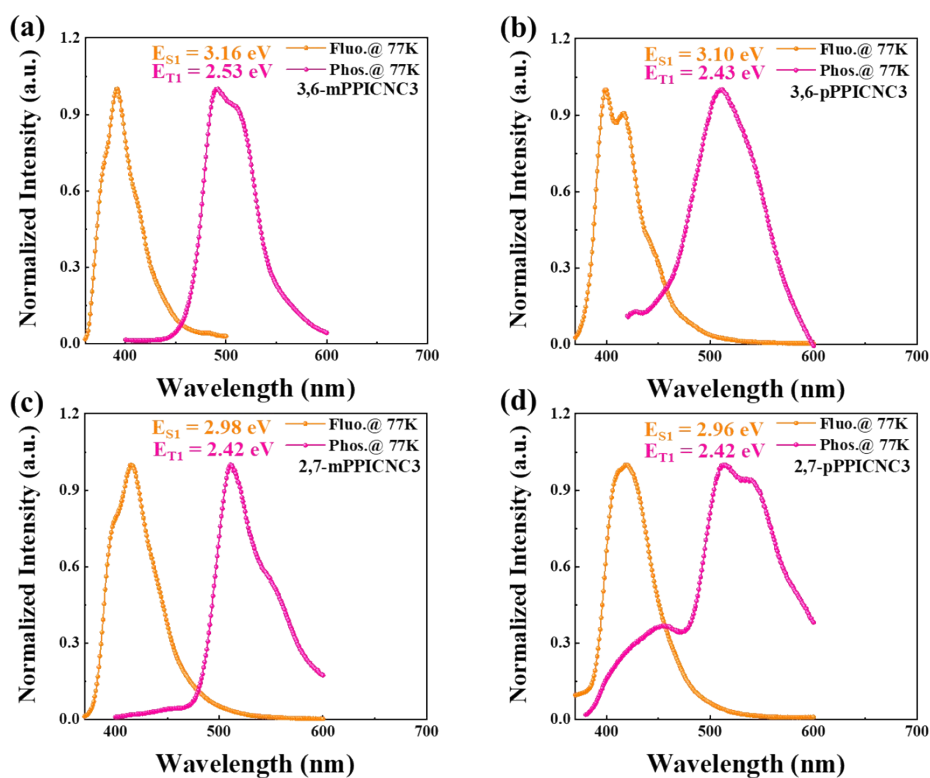

**Figure S8.** Low-temperature fluorescence and phosphorescence spectra of **3,6-mPPIcNC3** (a), **3,6-pPPIcNC3** (b), **2,7-mPPIcNC3** (c), and **2,7-pPPIcNC3** (d) in toluene solution ( $10^{-5}$  M) at 77 K.

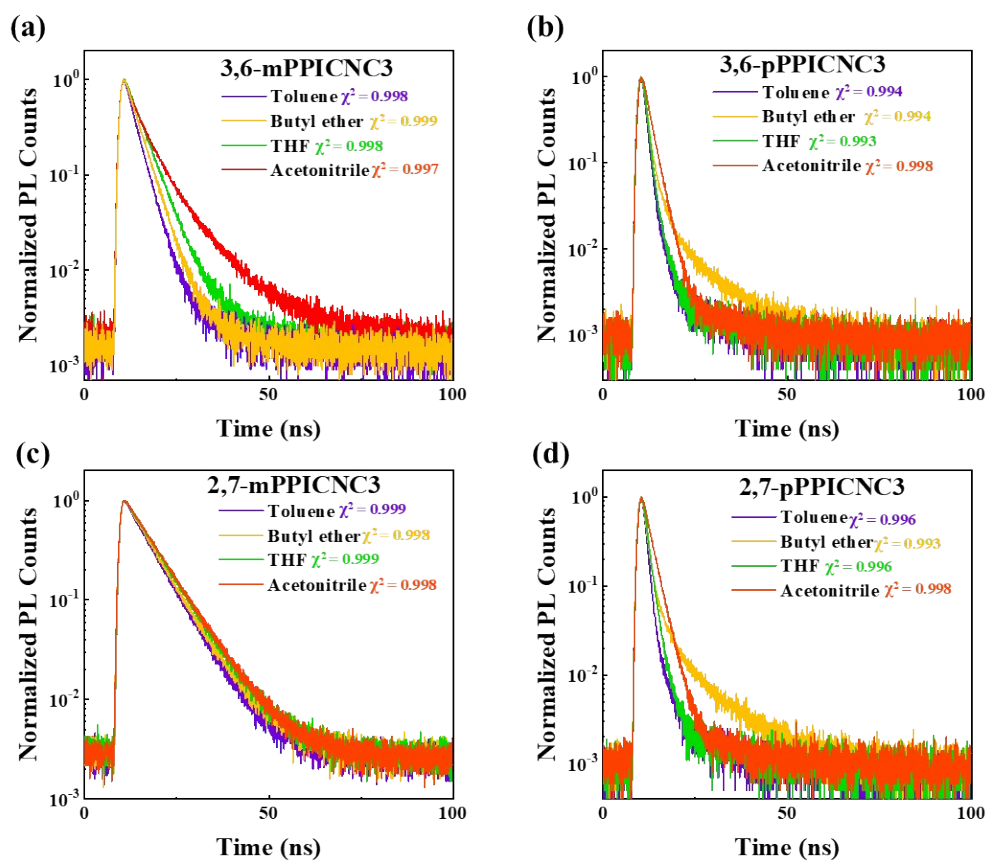

**Figure S9.** Transient PL decay spectra at toluene, butyl ether, THF, and acetonitrile solutions ( $10^{-5}$  M) of (a) **3,6-mPPI-CNC3**, (b) **3,6-pPPI-CNC3**, (c) **2,7-mPPI-CNC3** and (d) **2,7-pPPI-CNC3**. All the curves fitted by single-exponential decays with the  $\chi^2$  values exceeding 0.993.

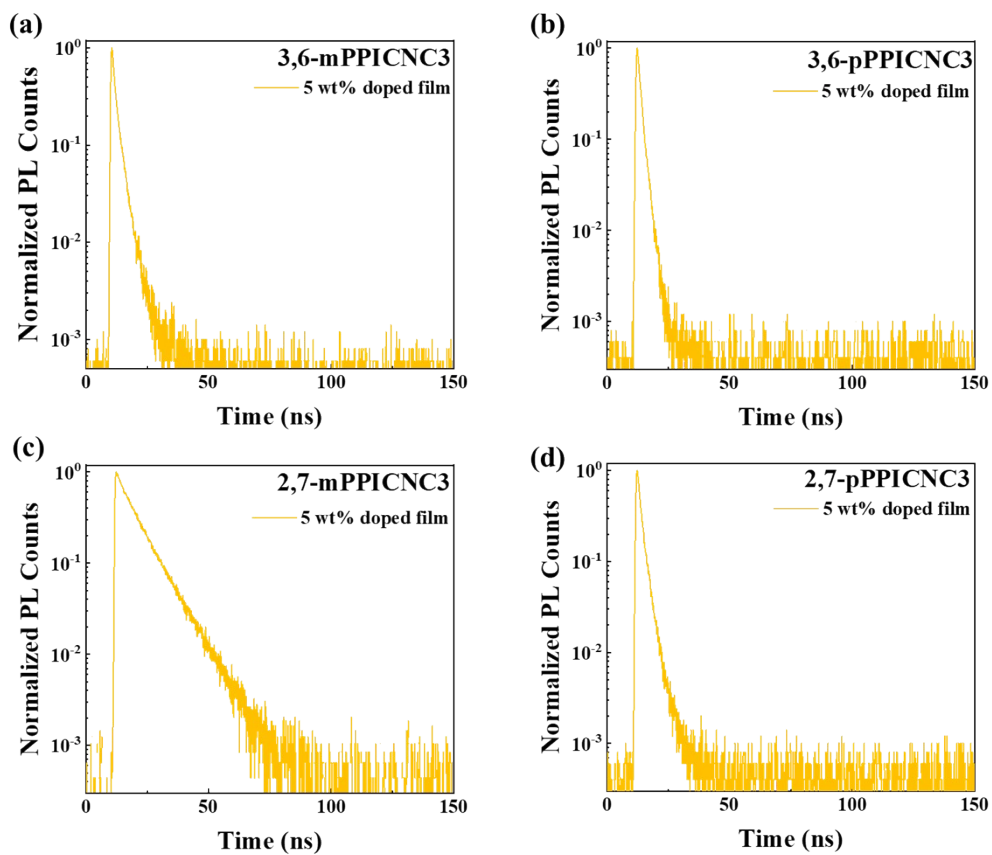

**Figure S10.** Transient PL decay spectra at 5 wt% doped films of (a) **3,6-mPPI-CNC3**, (b) **3,6-pPPI-CNC3**, (c) **2,7-mPPI-CNC3** and (d) **2,7-pPPI-CNC3**.

**Table S8.** PLQYs ( $\Phi_{\text{PL}}$ s), fluorescence lifetime ( $\tau$ ), radiative transition rate ( $k_r$ ) and non-radiative transition rate ( $k_{\text{nr}}$ ) of **3,6-mPPICNC3**, **3,6-pPPICNC3**, **2,7-mPPICNC3** and **2,7-pPPICNC3**.

|                          | $\Phi_{\text{PL}}$<br>[%] | $\tau$ [ns] | $k_r^a$<br>[ $\times 10^8 \text{ s}^{-1}$ ] | $k_{\text{nr}}^b$<br>[ $\times 10^8 \text{ s}^{-1}$ ] | $\Phi_{\text{PL}}$ [%] | $\tau$ [ns] | $k_r^a$<br>[ $\times 10^8 \text{ s}^{-1}$ ] | $k_{\text{nr}}^b$<br>[ $\times 10^8 \text{ s}^{-1}$ ] |  |
|--------------------------|---------------------------|-------------|---------------------------------------------|-------------------------------------------------------|------------------------|-------------|---------------------------------------------|-------------------------------------------------------|--|
| <b>3,6-mPPICNC3</b>      |                           |             |                                             |                                                       | <b>3,6-pPPICNC3</b>    |             |                                             |                                                       |  |
| Toluene                  | 82.6                      | 3.01        | 2.74                                        | 0.58                                                  | 95.3                   | 1.29        | 7.39                                        | 0.36                                                  |  |
| Butyl ether              | 92.9                      | 3.67        | 2.53                                        | 0.19                                                  | 95.4                   | 1.66        | 5.75                                        | 0.28                                                  |  |
| Tetrahydrofuran          | 94.3                      | 4.37        | 2.16                                        | 0.13                                                  | 96.2                   | 1.31        | 7.34                                        | 0.29                                                  |  |
| Acetonitrile             | 97.8                      | 4.96        | 1.97                                        | 0.04                                                  | 96.8                   | 2.20        | 4.40                                        | 0.15                                                  |  |
| 5 wt% doped<br>into PMMA | 61.4                      | 2.58        | 2.38                                        | 1.49                                                  | 93.4                   | 1.32        | 7.08                                        | 0.50                                                  |  |
| Neat film                | 59.1                      | 1.55        | 3.81                                        | 2.64                                                  | 63.0                   | 1.33        | 4.74                                        | 2.77                                                  |  |
| <b>2,7-mPPICNC3</b>      |                           |             |                                             |                                                       | <b>2,7-pPPICNC3</b>    |             |                                             |                                                       |  |
| Toluene                  | 93.3                      | 6.73        | 1.39                                        | 0.10                                                  | 97.5                   | 1.39        | 7.01                                        | 0.18                                                  |  |
| Butyl ether              | 93.6                      | 6.82        | 1.37                                        | 0.09                                                  | 97.9                   | 1.54        | 6.36                                        | 0.14                                                  |  |
| Tetrahydrofuran          | 96.9                      | 7.31        | 1.33                                        | 0.04                                                  | 98.4                   | 1.63        | 6.04                                        | 0.10                                                  |  |
| Acetonitrile             | 83.8                      | 7.60        | 1.10                                        | 0.21                                                  | 98.5                   | 2.54        | 3.88                                        | 0.06                                                  |  |
| 5 wt% doped<br>into PMMA | 91.0                      | 7.88        | 1.15                                        | 0.11                                                  | 97.4                   | 1.63        | 5.98                                        | 0.16                                                  |  |
| Neat film                | 61.9                      | 3.19        | 1.94                                        | 1.19                                                  | 63.3                   | 1.01        | 6.27                                        | 3.63                                                  |  |

<sup>a</sup>  $k_r = \Phi_{\text{PL}} / \tau$ ; <sup>b</sup>  $k_{\text{nr}} = 1/\tau - k_r$

### Detailed Analysis of Lippert-Mataga model

The Stokes shift ( $\nu_a - \nu_f$ ) versus orientational polarizability ( $f(\epsilon, n)$ ) of solvents can be constructed by the Lippert-Mataga model with the Equation 1 as below.

$$hc(\nu_a - \nu_f) = hc(\nu_a^0 - \nu_f^0) + \frac{2(\mu_e - \mu_g)^2}{a_0^3} f(\epsilon, n) \quad (1)$$

Here,  $h$  is the Plank constant,  $c$  is the light speed in vacuum,  $\mu_g$  and  $\mu_e$  are the ground-state excited-state dipole moments,  $f(\epsilon, n)$  is the orientational polarizability of solvents,  $a_0$  is the Onsager cavity radius,  $\nu_a^0 - \nu_f^0$  is the Stokes shifts when  $f$  is zero, respectively.

Take differential on both sides of the Equation 1, the Equation 2 can be obtained:

$$\mu_e = \mu_g + \left\{ \frac{hca_0^3}{2} \times \left[ \frac{d(\nu_a - \nu_f)}{df(\epsilon, n)} \right] \right\}^{1/2} \quad (2)$$

$(\epsilon, n)$  and  $a_0$  can be obtained by the Equation 3 and 4:

$$f(\epsilon, n) = \frac{\epsilon - 1}{2\epsilon + 1} + \frac{n^2 - 1}{2n^2 + 1} \quad (3)$$

$$a_0 = \left( \frac{3M}{4\pi Nd} \right)^{1/3} \quad (4)$$

Where,  $\epsilon$  and  $n$  are dielectric constant and refractive index of solvent,  $N$  is Avogadro's number,  $M$  is molar mass, and  $d$  is density of the solvents, respectively. The values of  $f(\epsilon, n)$  and  $a_0$  can be estimated by the Equation 3 and 4. The  $\mu_{g^S}$  of **3,6-mPPICNC3**, **3,6-pPPICNC3**, **2,7-mPPICNC3**, **2,7-pPPICNC3** were estimated to be 7.73, 4.77, 9.75 and 6.73 Debye by the

Gaussian 09 package at the level of B3LYP/6-31G(d,p). The  $\frac{d(\nu_a - \nu_f)}{df(\epsilon, n)}$  can be estimated with the solvatochromic experiment data listed in Tables S8 and S9.



**Table S9.** The detailed absorption, emission peak and of **3,6-mPPICNC3** and **3,6-pPPICNC3** in different solvents.

| Solvents          | $\epsilon$ | n     | $f(\epsilon, n)$ | 3,6-mPPICNC3 |             |                     | 3,6-pPPICNC3 |             |                     |
|-------------------|------------|-------|------------------|--------------|-------------|---------------------|--------------|-------------|---------------------|
|                   |            |       |                  | $\lambda_a$  | $\lambda_r$ | $\nu_a - \nu_r$     | $\lambda_a$  | $\lambda_r$ | $\nu_a - \nu_r$     |
|                   |            |       |                  | [nm]         | [nm]        | [cm <sup>-1</sup> ] | [nm]         | [nm]        | [cm <sup>-1</sup> ] |
| Hexane            | 1.9        | 1.375 | 0.0012           | 326          | 367         | 3426.89             | 341          | 393         | 3880.22             |
| Toluene           | 2.38       | 1.494 | 0.013            | 330          | 389         | 4596.09             | 343          | 400         | 4154.52             |
| Triethylamine     | 2.42       | 1.401 | 0.048            | 328          | 387         | 4648.01             | 341          | 395         | 4009.06             |
| Butyl ether       | 3.08       | 1.399 | 0.096            | 328          | 387         | 4648.01             | 341          | 396         | 4072.99             |
| Isopropyl ether   | 3.88       | 1.368 | 0.145            | 327          | 387         | 4741.25             | 339          | 395         | 4182.07             |
| Ethyl ether       | 4.34       | 1.352 | 0.167            | 326          | 387         | 4835.05             | 339          | 395         | 4182.07             |
| Ethyl acetate     | 6.02       | 1.372 | 0.2              | 328          | 400         | 5487.80             | 340          | 398         | 4286.14             |
| Tetrahydrofuran   | 7.58       | 1.407 | 0.21             | 330          | 403         | 5489.13             | 341          | 401         | 4387.86             |
| Dichloromethane   | 8.93       | 1.424 | 0.217            | 330          | 414         | 6148.44             | 341          | 402         | 4449.89             |
| Dimethylformamide | 37         | 1.427 | 0.276            | 330          | 433         | 7208.34             | 344          | 407         | 4499.74             |
| Acetone           | 20.7       | 1.359 | 0.284            | 330          | 422         | 6606.35             | 344          | 404         | 4317.29             |
| Acetonitrile      | 37.5       | 1.344 | 0.305            | 330          | 432         | 7154.88             | 344          | 409         | 4619.89             |

**Table S10.** The detailed absorption and emission peaks of **2,7-mPPICNC3** and **2,7-pPPICNC3** in different solutions.

| Solvents          | $\epsilon$ | n     | $f(\epsilon, n)$ | 2,7-mPPICNC3 |             |                     | □   | 2,7-pPPICNC3 |             |                     |
|-------------------|------------|-------|------------------|--------------|-------------|---------------------|-----|--------------|-------------|---------------------|
|                   |            |       |                  | $\lambda_a$  | $\lambda_r$ | $\nu_a - \nu_r$     |     | $\lambda_a$  | $\lambda_r$ | $\nu_a - \nu_r$     |
|                   |            |       |                  | [nm]         | [nm]        | [cm <sup>-1</sup> ] |     | [nm]         | [nm]        | [cm <sup>-1</sup> ] |
| Hexane            | 1.9        | 1.375 | 0.0012           | 332          | 413         | 5907.41             | 367 | 409          | 2798.08     |                     |
| Toluene           | 2.38       | 1.494 | 0.013            | 335          | 424         | 6265.84             | 367 | 416          | 3209.49     |                     |
| Triethylamine     | 2.42       | 1.401 | 0.048            | 333          | 417         | 6049.21             | 367 | 412          | 2976.11     |                     |
| Butyl ether       | 3.08       | 1.399 | 0.096            | 332          | 418         | 6197.04             | 367 | 413          | 3034.88     |                     |
| Isopropyl ether   | 3.88       | 1.368 | 0.145            | 331          | 418         | 6288.04             | 365 | 411          | 3066.36     |                     |
| Ethyl ether       | 4.34       | 1.352 | 0.167            | 332          | 420         | 6310.96             | 364 | 411          | 3141.63     |                     |
| Ethyl acetate     | 6.02       | 1.372 | 0.2              | 333          | 426         | 6555.85             | 364 | 414          | 3317.94     |                     |
| Tetrahydrofuran   | 7.58       | 1.407 | 0.21             | 334          | 427         | 6520.92             | 364 | 417          | 3491.71     |                     |
| Dichloromethane   | 8.93       | 1.424 | 0.217            | 334          | 430         | 6684.31             | 366 | 419          | 3456.06     |                     |
| Dimethylformamide | 37         | 1.427 | 0.276            | 337          | 439         | 6894.55             | 366 | 421          | 3569.44     |                     |
| Acetone           | 20.7       | 1.359 | 0.284            | 333          | 433         | 6935.34             | 365 | 422          | 3700.58     |                     |
| Acetonitrile      | 37.5       | 1.344 | 0.305            | 333          | 436         | 7094.25             | 363 | 423          | 3907.547    |                     |

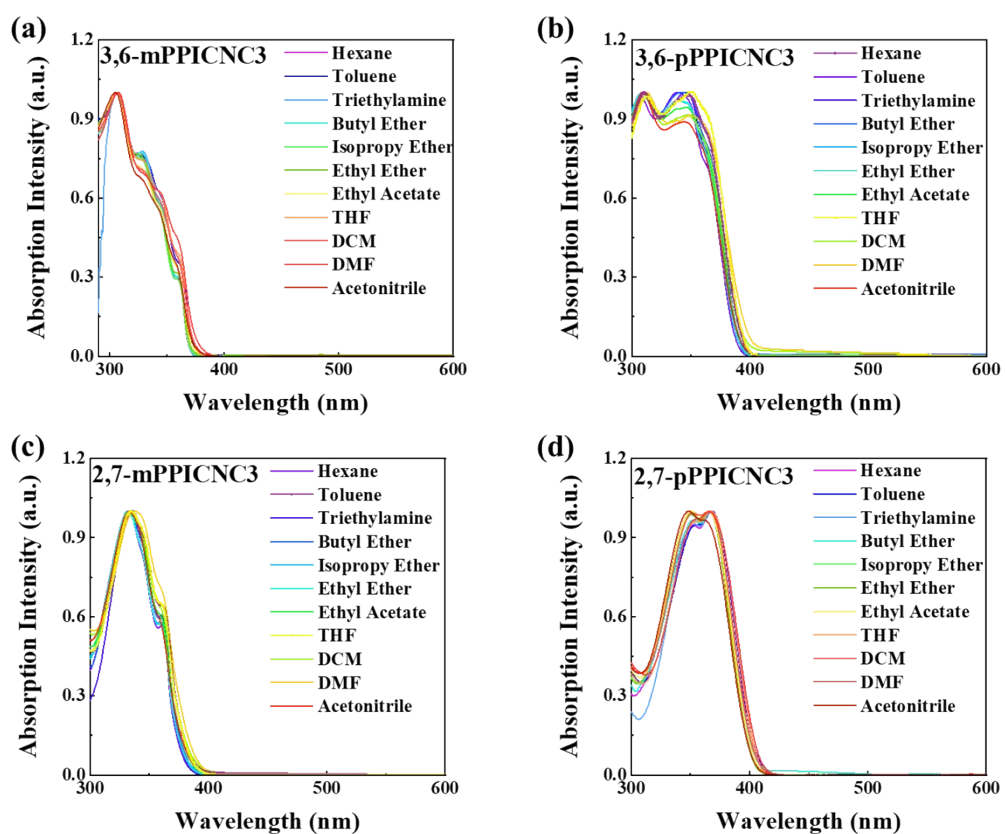

**Figure S11.** UV-vis absorption spectra of (a) 3,6-mPPICNC3, (b) 3,6-pPPICNC3, (c) 2,7-mPPICNC3 and (d) 2,7-pPPICNC3 in different solutions.

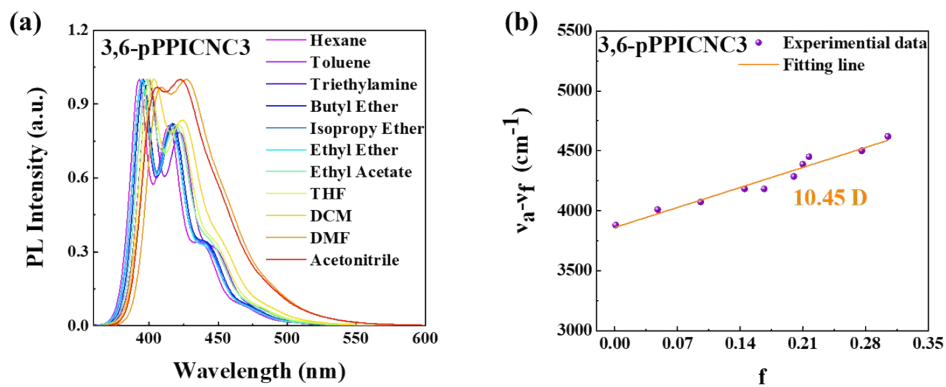

**Figure S12.** Solvation effects on PL spectra (a) and Lippert-Mataga plots (b) of 3,6-pPPICNC3.

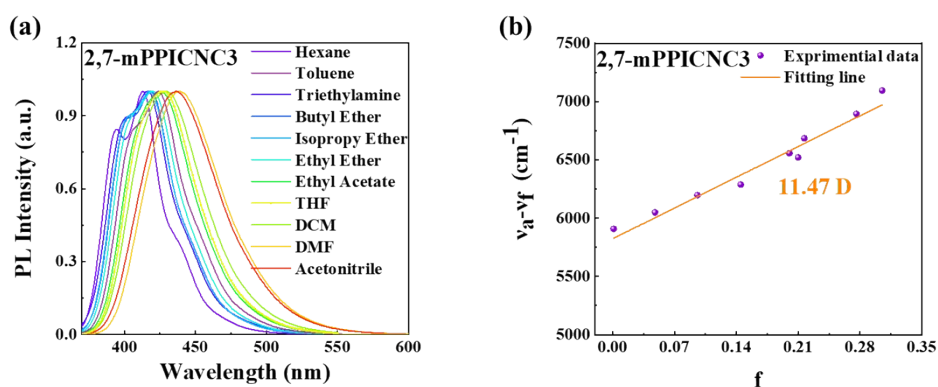

**Figure S13.** Solvation effects on PL spectra (a) and Lippert-Mataga plots (b) of 2,7-mPPICNC3.

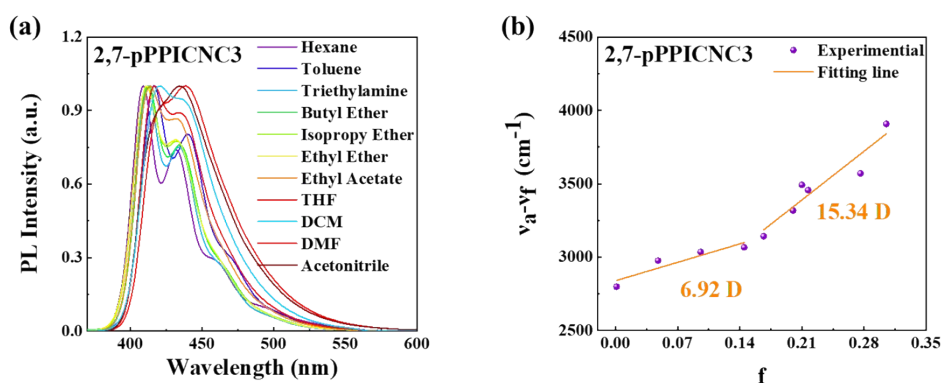

**Figure S14.** Solvation effects on PL spectra (a) and Lippert-Mataga plots (b) of 2,7-pPPICNC3.

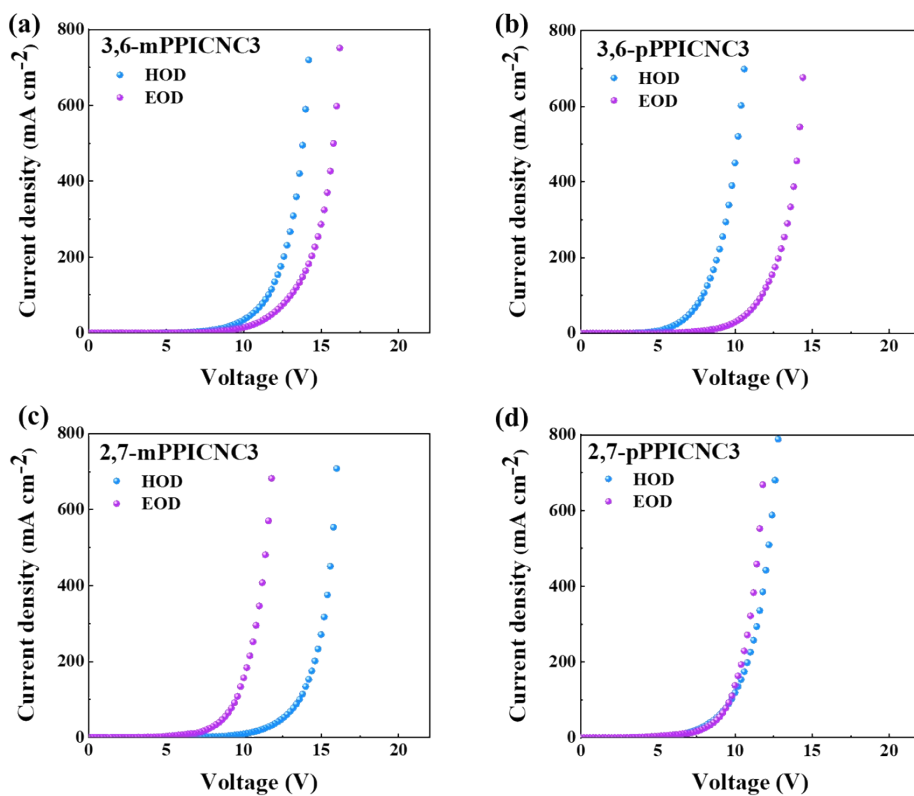

**Figure S15.** Current density versus voltage curves of the hole-only and electron-only devices of (a) 3,6-mPPICNC3, (b) 3,6-pPPICNC3, (c) 2,7-mPPICNC3 and (d) 2,7-pPPICNC3.

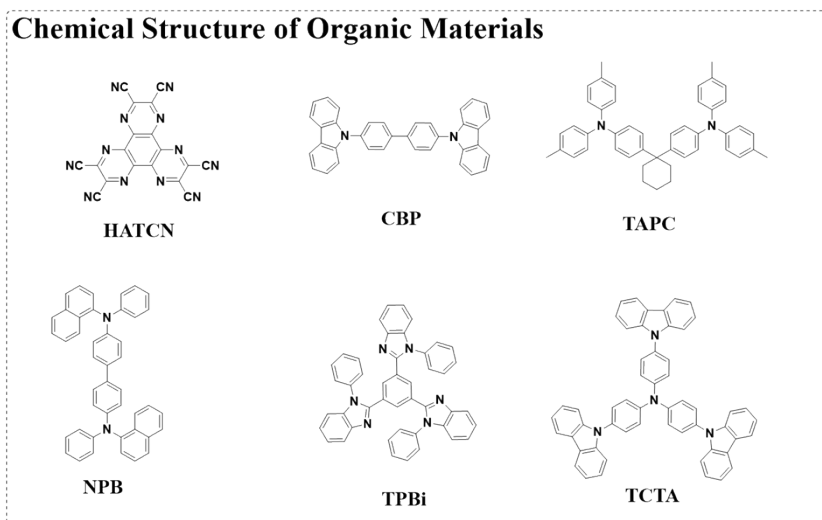

**Figure S16.** Chemical structure of organic materials used in this work.

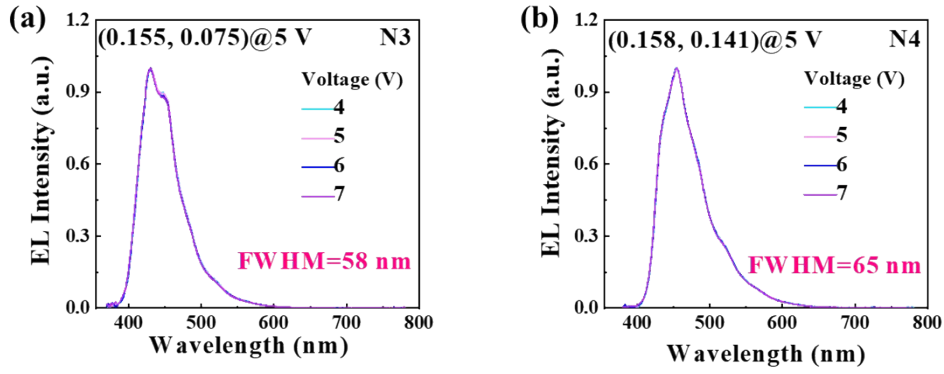

**Figure S17.** Normalized EL spectra at different applied voltages of the devices (a) N3, (b) N4.

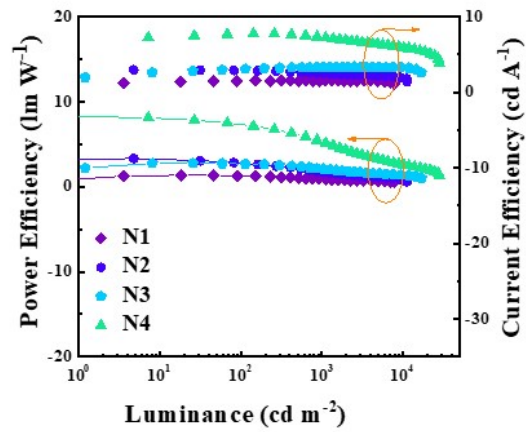

**Figure S18.** Power efficiency-luminance-current efficiency curves of the devices N1-4.

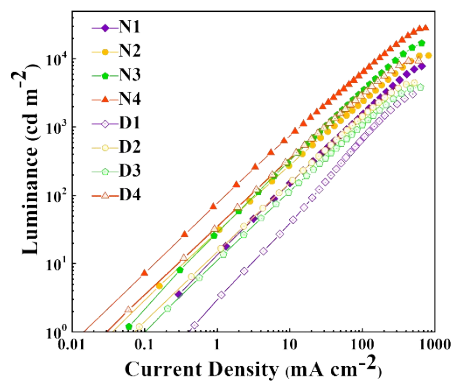

**Figure S19.** Current density-luminance curves of devices N1-4 and D1-4.

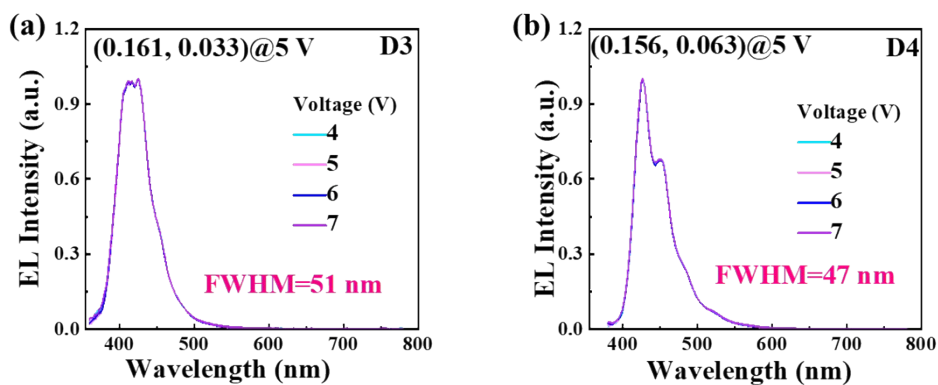

**Figure S20.** Normalized EL spectra at different applied voltages of the devices (a) **D3** and (b) **D4**.

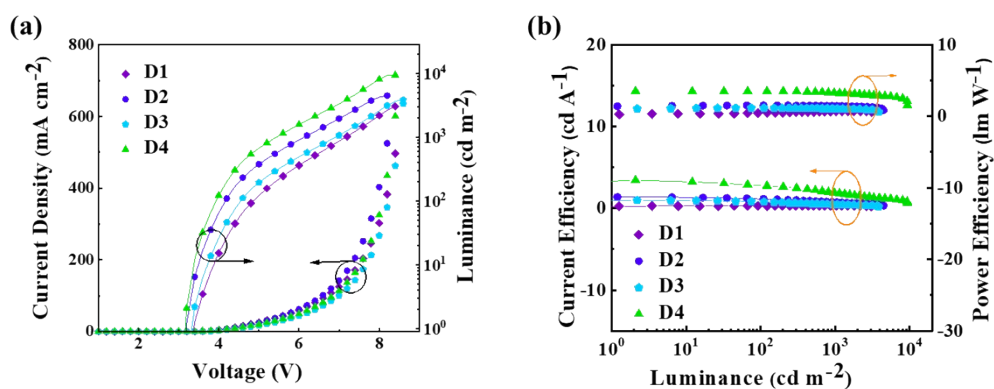

**Figure S21.** (a) Current density–voltage–luminance characteristics of the devices **D1–4** based on the configurations of ITO/ 1,4,5,8,9,11- hexaazatriphenylenehexacarbonitrile (HATCN, 20 nm)/ 4,4'-(cyclohexane-1,1-diyl)bis(*N,N*-di-*p*-tolylaniline) (TAPC, 45 nm)/ tris(4-(9H-carbazol-9-yl)phenyl)amine (TCTA, 10 nm)/ 4,4'-bis(*N*-carbazolyl)-1,1'-biphenyl (CBP):Emitter (5 wt%, 20 nm)/ 1,3,5-tris(1-phenyl-1H-benzo[d]imidazol-2-yl)benzene (TPBi, 10 nm)/ LiF (1 nm)/ Al (100 nm). (b) Power efficiency-luminance-current efficiency curves of the devices **D1–4**.

**Table S11.** Summary of highly efficient violet-blue non-doped and doped (D) fluorescent OLEDs with the CIEy small than 0.05 reported in recent years.

| Compound         | EQE <sub>max</sub> [%] | EQE <sub>1000</sub> [%] | FWHM [nm] | EL Peak [nm] | CIE(x,y)       | Ref.      |
|------------------|------------------------|-------------------------|-----------|--------------|----------------|-----------|
| 3,6-mPPICNC3     | 7.67                   | 7.65 <sup>a</sup>       | 44        | 412          | (0.160, 0.032) | This work |
| 3,6-mPPICNC3 (D) | 7.85                   | 7.48                    | 41        | 391          | (0.161, 0.025) | This work |
| POPCN-CP         | 5.3                    | 2.3                     | 51        | 404          | (0.160, 0.034) | 1         |
| POPCN-2CP        | 7.5                    | 6.1                     | 52        | 404          | (0.159, 0.035) | 1         |
| POPCN-2CP (D)    | 8.2                    | 5.7                     | 50        | 404          | (0.161, 0.034) | 1         |
| mTPA-PPI         | 3.33                   | -                       | -         | 404          | (0.161, 0.049) | 2         |
| PITZF (D)        | 6.07                   | 4.88                    | 55        | 411          | (0.159, 0.049) | 3         |
| PITZtCz (D)      | 7.21                   | 6.15                    | 61        | 413          | (0.158, 0.050) | 3         |
| PI-TAZ-tbuCz (D) | 6.01                   | 5.10                    | 52        | 407          | (0.160, 0.043) | 4         |
| TPBCzC1          | 4.34                   | -                       | -         | 422          | (0.160, 0.035) | 5         |
| DCZ2F            | 5.62                   | 4.23                    | 47        | 404          | (0.163, 0.038) | 6         |
| CTPPI            | 8.10                   | 4.2                     | -         | 403          | (0.160, 0.040) | 7         |
| DSiTPI (D)       | 7.40                   | -                       | -         | 396          | (0.160, 0.050) | 8         |
| CSiTPI (D)       | 5.20                   | -                       | -         | 388          | (0.160, 0.050) | 8         |
| TBOSi (D)        | 9.15                   | -                       | -         | 414          | (0.165, 0.034) | 9         |
| TBOSiCz (D)      | 8.91                   | -                       | -         | 414          | (0.163, 0.031) | 9         |
| SBF-PI-SBF       | 6.19                   | 5.75                    | 64        | 436          | (0.155, 0.049) | 10        |
| FIP-CZ (D)       | 10.4                   | 7.3                     | 49        | 427          | (0.158, 0.039) | 11        |
| TPBCzC1          | 4.34                   | -                       | -         | 438          | (0.159, 0.035) | 12        |
| Cz-2pbb (D)      | 2.90                   | -                       | -         | 410          | (0.16, 0.05)   | 13        |
| 2MCz-CNMCz       | 7.76                   | 5.61                    | -         | 404          | (0.158, 0.039) | 14        |
| ICZ-TAZ (D)      | 4.02                   | -                       | 46        | 406          | (0.162, 0.037) | 15        |
| 2BuCz-CNCz       | 5.24                   | -                       | -         | 408          | (0.157, 0.050) | 16        |
| 2BuCz-CNCz (D)   | 10.79                  | 6.80                    | -         | 396          | (0.161, 0.031) | 17        |
| CSP-Bu (D)       | 6.70                   | 3.69                    | 57        | 404          | (0.158, 0.043) | 17        |
| CSP-OMe (D)      | 7.32                   | 4.75                    | 58        | 406          | (0.158, 0.047) | 17        |
| VDMP-36PhCz      | 6.27                   | 4.28                    | 46        | 402          | (0.161, 0.043) | 18        |
| VDMP-36PhCz (D)  | 7.55                   | 5.37                    | 50        | 404          | (0.159, 0.039) | 18        |
| TTT-TPA-H (D)    | 10.54                  | -                       | -         | 426          | (0.15, 0.05)   | 19        |
| SPA-DBS (D)      | 1.02                   | -                       | 55        | 428          | (0.16, 0.04)   | 20        |
| TFPy4 (D)        | 5.10                   | -                       | 54        | 404          | (0.16, 0.02)   | 21        |
| 2Na-CzCN (D)     | 6.15                   | 5.73                    | 36        | 392          | (0.16, 0.04)   | 22        |
| mP2MPC           | 6.09                   | 5.56                    | 51        | 395          | (0.163, 0.028) | 23        |

<sup>a</sup> Recorded at 3300 cd m<sup>-2</sup>.

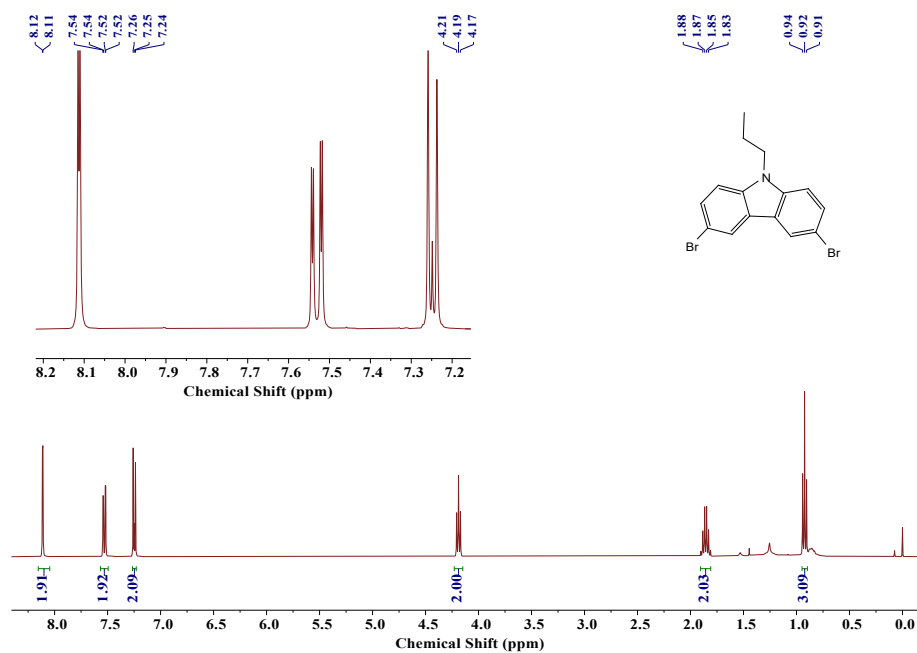

Figure S22.  $^1\text{H}$  NMR spectrum of 3,6-Br-C3Cz in  $\text{CDCl}_3$ .

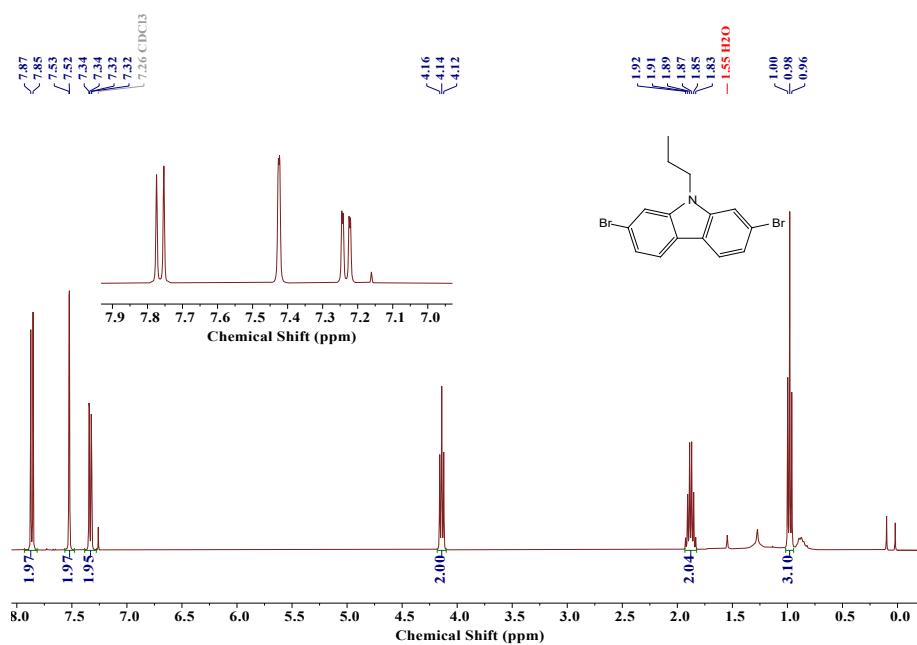

Figure S23.  $^1\text{H}$  NMR spectrum of 2,7-Br-C3Cz in  $\text{CDCl}_3$ .



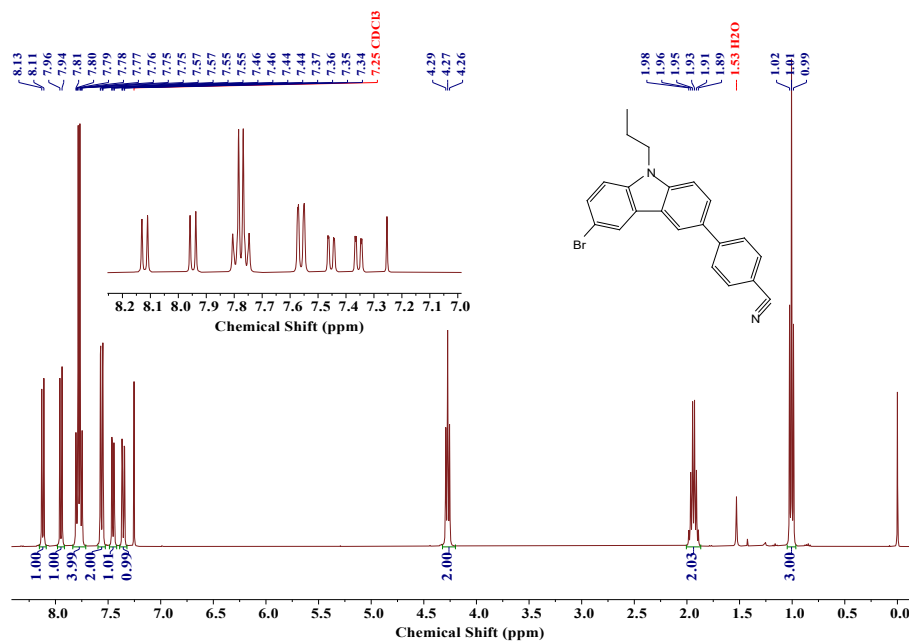

Figure S24. <sup>1</sup>H NMR spectrum of 3,6-CNC3 in CDCl<sub>3</sub>.

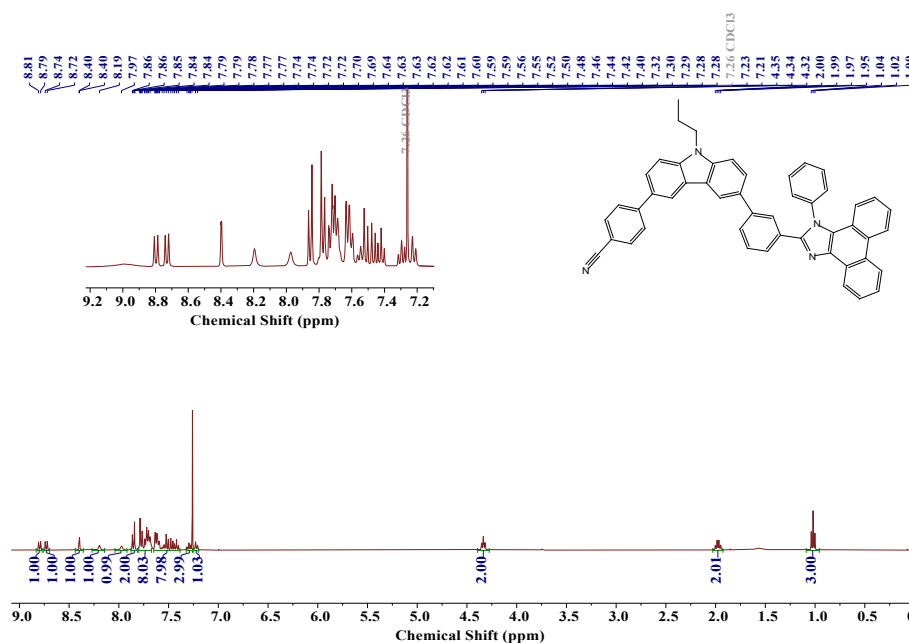

Figure S25. <sup>1</sup>H NMR spectrum of 3,6-mPPICNC3 in CDCl<sub>3</sub>.

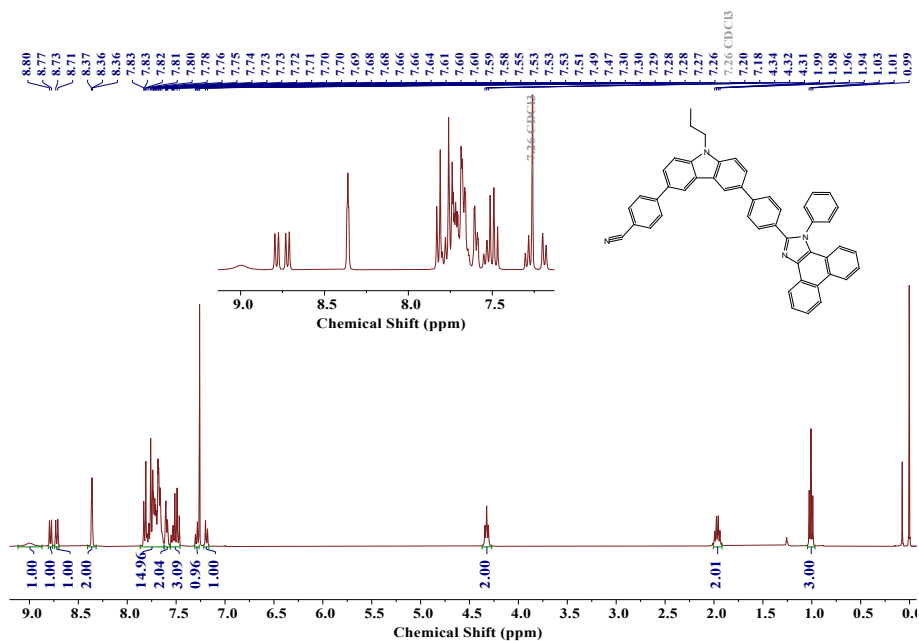

Figure S26. <sup>1</sup>H NMR spectrum of 3,6-pPPICNC3 in CDCl<sub>3</sub>.

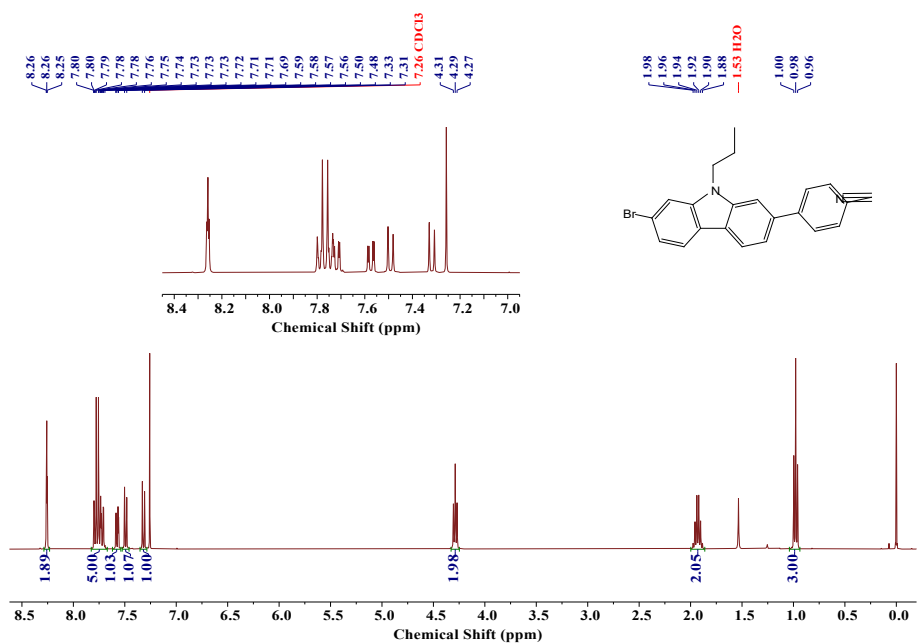

Figure S27. <sup>1</sup>H NMR spectrum of 2-CNC3 in CDCl<sub>3</sub>.

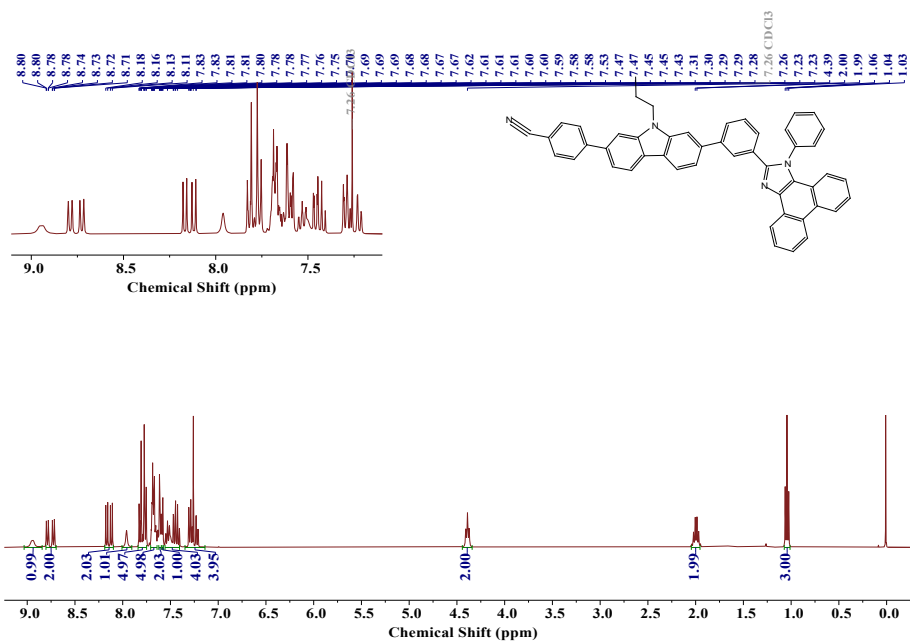

Figure S28.  $^1\text{H}$  NMR spectrum of 2,7-mPPICNC3 in CDCl<sub>3</sub>.

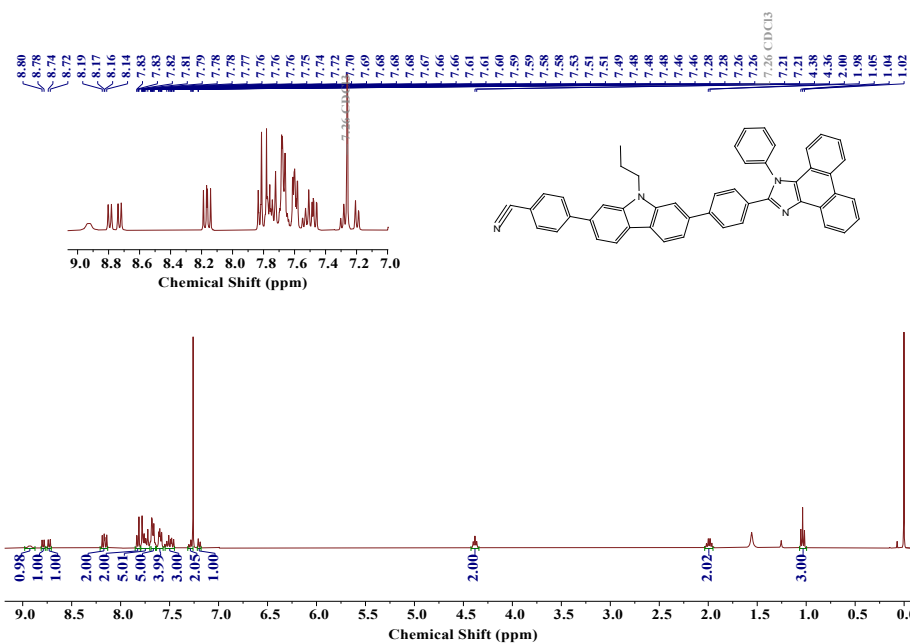

Figure S29.  $^1\text{H}$  NMR spectrum of 2,7-pPPICNC3 in CDCl<sub>3</sub>.

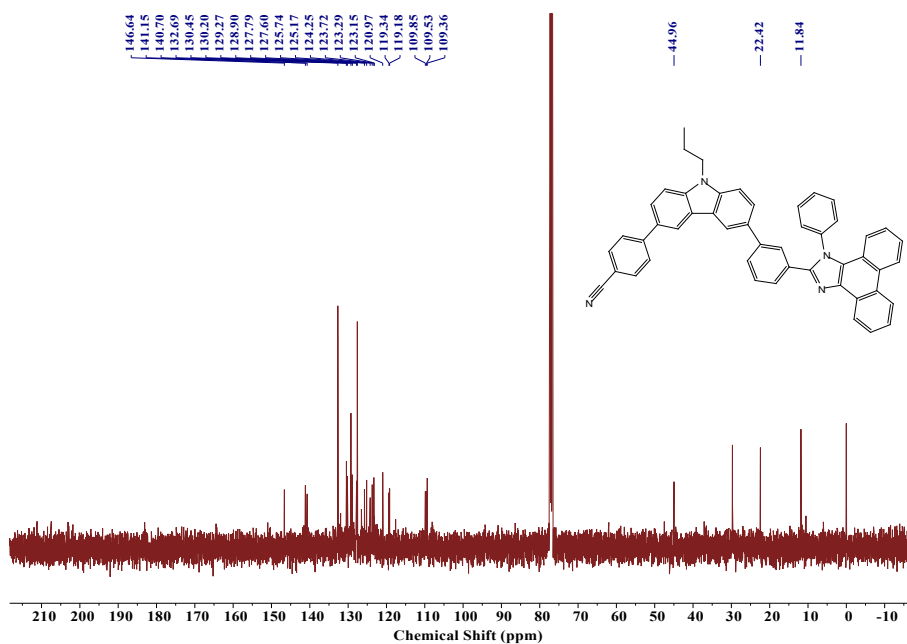

Figure S30.  $^{13}\text{C}$  NMR spectrum of **3,6-mPPICNC3** in  $\text{CDCl}_3$ .

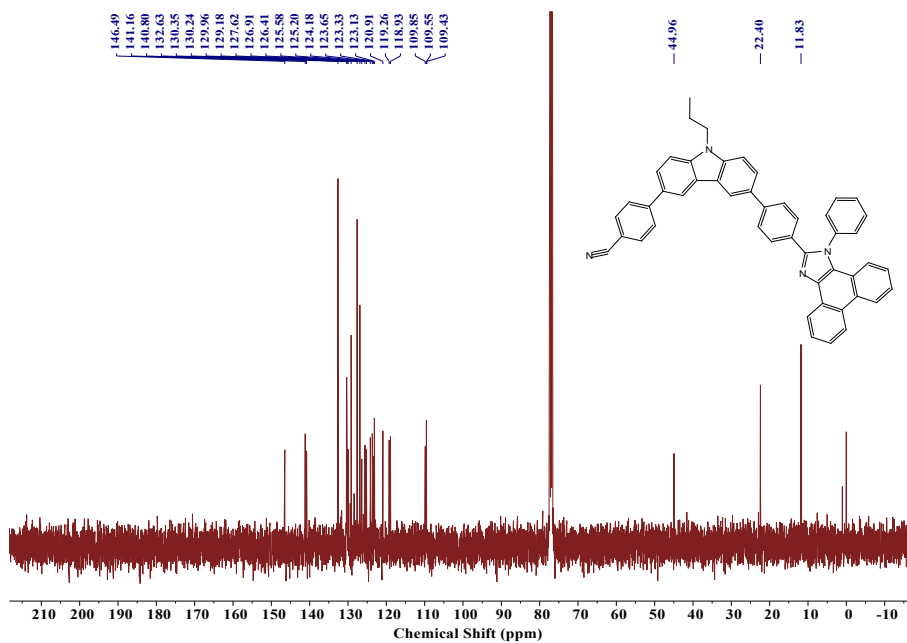

Figure S31.  $^{13}\text{C}$  NMR spectrum of **3,6-pPPICNC3** in  $\text{CDCl}_3$ .

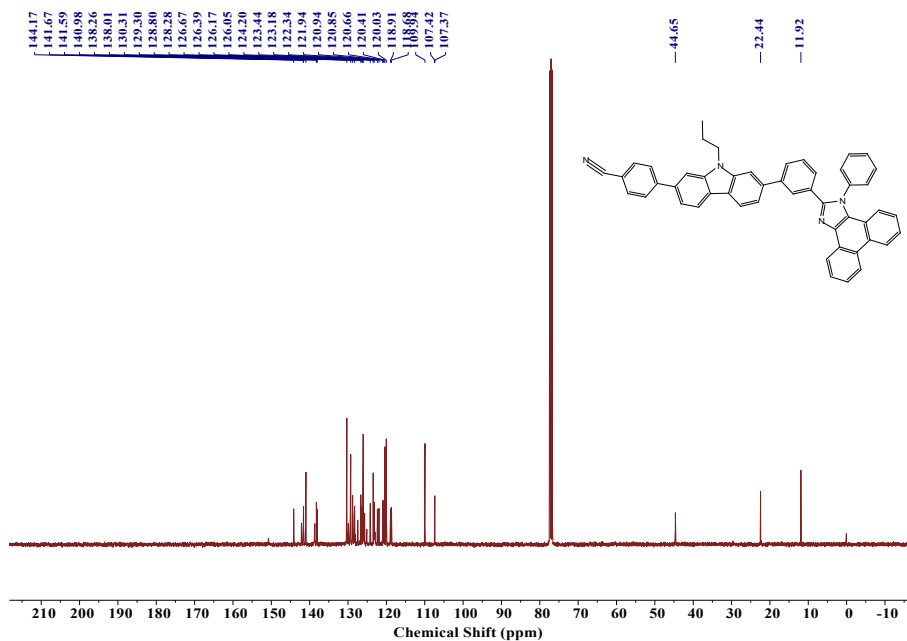

Figure S32.  $^{13}\text{C}$  NMR spectrum of 2,7-mPPICNC3 in  $\text{CDCl}_3$ .

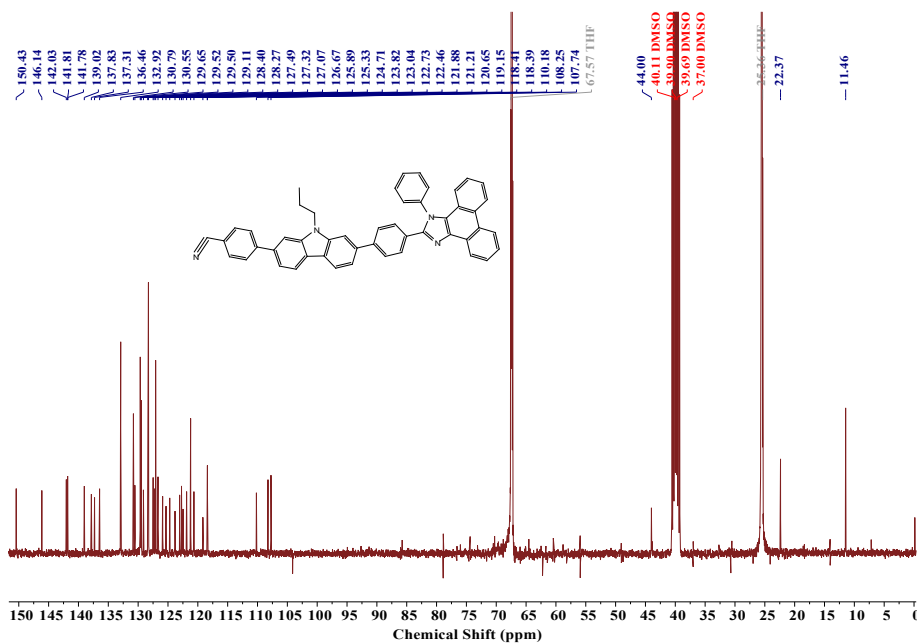

Figure S33.  $^{13}\text{C}$  NMR spectrum of 2,7-pPPICNC3 in  $\text{DMSO-}d_6$ .

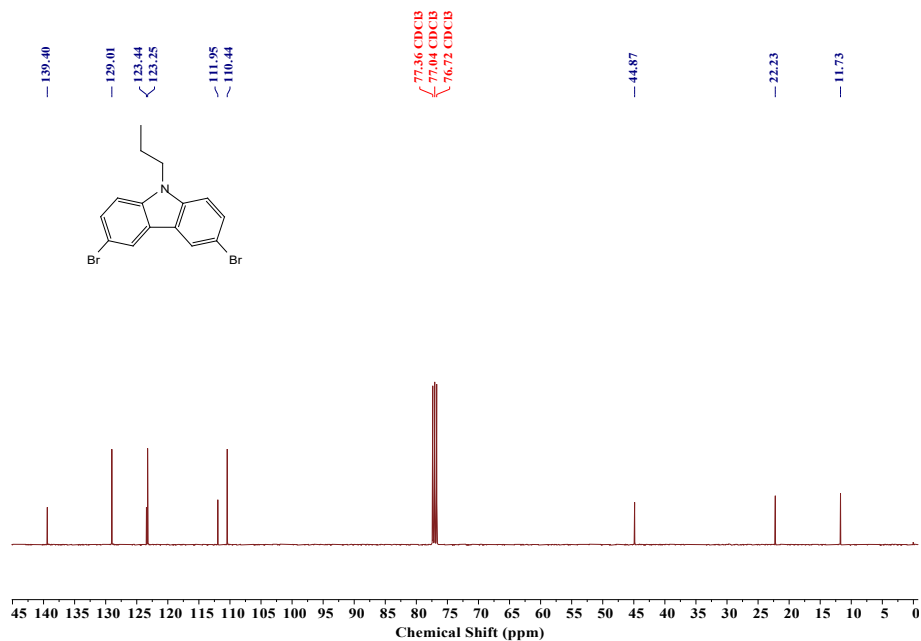

**Figure S34.** <sup>13</sup>C NMR spectrum of **3,6-Br-C3Cz** in CDCl<sub>3</sub>.

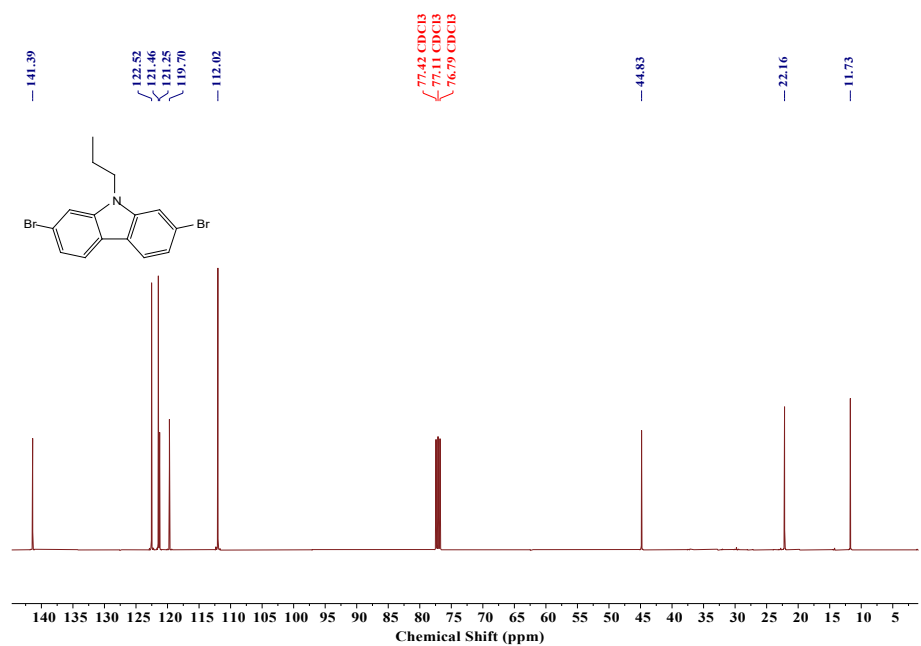

**Figure S35.** <sup>13</sup>C NMR spectrum of **2,7-Br-C3Cz** in CDCl<sub>3</sub>.

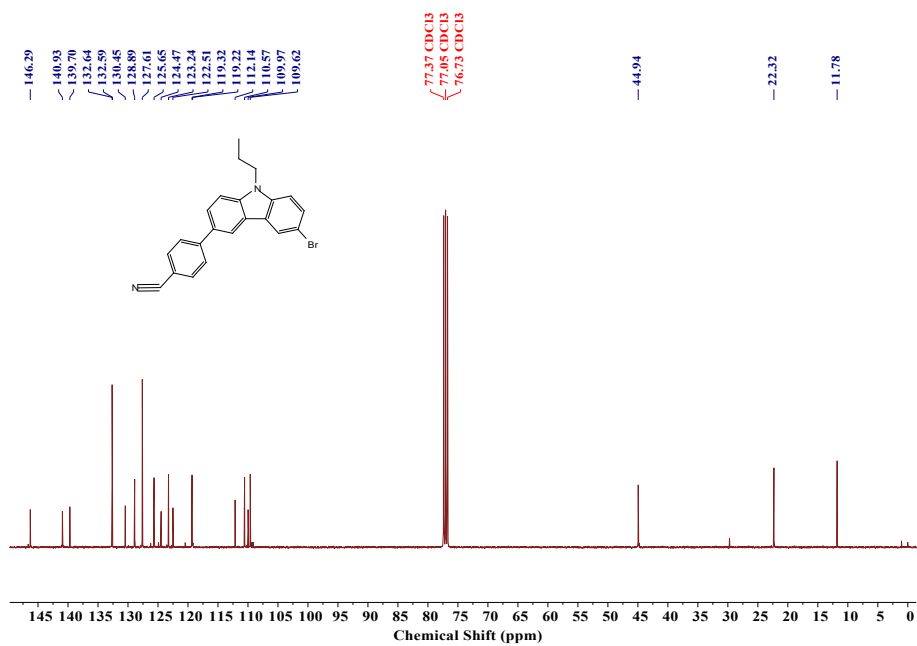

Figure S36. <sup>13</sup>C NMR spectrum of 3,6-CNC3 in CDCl<sub>3</sub>.

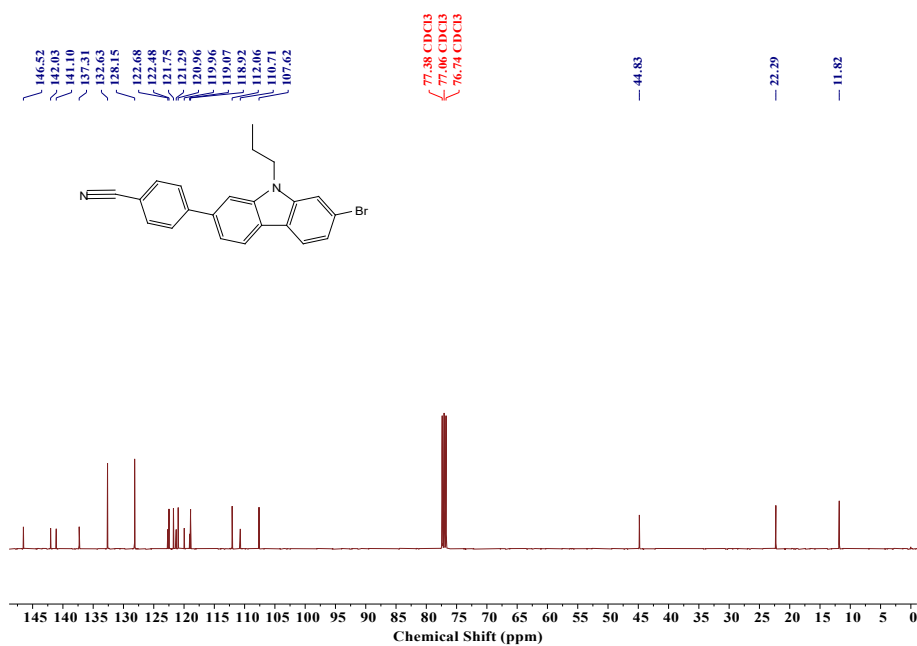

Figure S37. <sup>13</sup>C NMR spectrum of 2-CNC3 in CDCl<sub>3</sub>.

## References

- [1] J. Chen, H. Liu, J. Guo, J. Wang, N. Qiu, S. Xiao, J. Chi, D. Yang, D. Ma, Z. Zhao, B. Z. Tang, *Angewandte Chemie International Edition* **2022**, 61, e202116810.
- [2] H. Liu, Q. Bai, L. Yao, H. Zhang, H. Xu, S. Zhang, W. Li, Y. Gao, J. Li, P. Lu, H. Wang, B. Yang, Y.

- Ma, *Chemical Science* **2015**, 6, 3797.
- [3] L. Peng, J. Lv, Y. Huo, L. Hua, Y. Liu, S. Ying, S. Yan, *Dyes and Pigments* **2022**, 206, 110676.
- [4] L. Peng, Y. Huo, L. Hua, J. Lv, Y. Liu, S. Ying, S. Yan, *Journal of Materials Chemistry C* **2022**, 10, 9621.
- [5] P. Han, C. Lin, D. Ma, A. Qin, B. Z. Tang, *ACS Applied Materials & Interfaces* **2020**, 12, 46366.
- [6] Y. Huo, J. Lv, M. Wang, Z. Duan, H. Qi, S. Wang, Y. Liu, L. Peng, S. Ying, S. Yan, *Journal of Materials Chemistry C* **2023**, 11, 6347.
- [7] Z. Zhong, X. Zhu, X. Wang, Y. Zheng, S. Geng, Z. Zhou, X. J. Feng, Z. Zhao, H. Lu, *Advanced Functional Materials* **2022**, 32, 2112969.
- [8] Y. Zheng, X. Zhu, Z. Ni, X. Wang, Z. Zhong, X. J. Feng, Z. Zhao, H. Lu, *Advanced Optical Materials* **2021**, 9, 2100965.
- [9] X. Q. Gan, Z. M. Ding, D. H. Liu, W. Q. Zheng, B. Ma, H. Zhang, X. Chang, L. Wang, Y. Liu, X. Wu, S. J. Su, W. Zhu, *Advanced Optical Materials* **2023**, 11, 2300195.
- [10] S. S. Tang, G. X. Yang, J. J. Zhu, X. He, J. X. Jian, F. Lu, Q. X. Tong, *Chemistry – A European Journal* **2021**, 27, 9102.
- [11] C. Liao, B. Chen, Q. Xie, X. Li, H. Liu, S. Wang, *Advanced Materials* **2023**, 35, 2305310.
- [12] P. Han, A. Qin, B. Z. Tang, *Chemical Research in Chinese Universities* **2021**, 37, 16.
- [13] X. Yang, S. Zheng, R. Bottger, H. S. Chae, T. Tanaka, S. Li, A. Mochizuki, G. E. Jabbour, *The Journal of Physical Chemistry C* **2011**, 115, 14347.
- [14] X. Guo, G. Li, J. Lou, K. Chen, R. Huang, D. Yang, H. Zhang, Z. Wang, B. Z. Tang, *Small* **2022**, 18, 2204029.
- [15] X. He, J. Lou, B. Li, H. Wang, X. Peng, G. Li, L. Liu, Y. Huang, N. Zheng, L. Xing, Y. Huo, D. Yang, D. Ma, Z. Zhao, Z. Wang, B. Z. Tang, *Angewandte Chemie International Edition* **2022**, 61, e202209425.
- [16] H. Zhang, G. Li, X. Guo, K. Zhang, B. Zhang, X. Guo, Y. Li, J. Fan, Z. Wang, D. Ma, B. Z. Tang, *Angewandte Chemie International Edition* **2021**, 60, 22241.
- [17] S. Geng, Z. Liu, H. Li, Z. Zhong, X. J. Feng, Z. Zhao, H. Lu, *Advanced Optical Materials* **2023**, DOI: 10.1002/adom.202301344.
- [18] T. Chen, J. Lou, H. Wu, J. Luo, D. Yang, X. Qiao, H. Zhang, B. Z. Tang, Z. Wang, *Advanced Optical*



*Materials* **2023**, DOI: 10.1002/adom.202301053.

- [19] S. Zeng, C. Xiao, J. Zhou, Q. Dong, Q. Li, J. Lim, H. Ma, J. Y. Lee, W. Zhu, Y. Wang, *Advanced Functional Materials* **2022**, 32.
- [20] C. Brouillac, W.-S. Shen, J. Rault-Berthelot, O. Jeannin, C. Quinton, Z.-Q. Jiang, C. Poriel, *Materials Chemistry Frontiers* **2022**, 6, 1803.
- [21] S. N. Zou, X. Chen, S. Y. Yang, S. Kumar, Y. K. Qu, Y. J. Yu, M. K. Fung, Z. Q. Jiang, L. S. Liao, *Advanced Optical Materials* **2020**, 8.
- [22] G. Li, B. Li, H. Zhang, X. Guo, C. Lin, K. Chen, Z. Wang, D. Ma, B. Z. Tang, *ACS Applied Materials & Interfaces* **2022**, 14, 10627.
- [23] L. Peng, J. Lv, S. Xiao, Y. Huo, Y. Liu, D. Ma, S. Ying, S. Yan, *Chemical Engineering Journal* **2022**, 450.
- [24] L. Lu, F. Chen, *J. Comput. Chem.*, **2012**, 33, 580.
- [25] F. Neese, *WIREs Computational Molecular Science* **2012**, 2, 73.
